# Structure and dynamics of *Odinarchaeota* tubulin and the implications for eukaryotic microtubule evolution

Caner Akil<sup>1,2†</sup>, Samson Ali<sup>1,3†</sup>, Linh T. Tran<sup>1†</sup>, Jeremie Gaillard<sup>4</sup>, Wenfei Li<sup>5</sup>, Kenichi Hayashida<sup>6</sup>, Mika Hirose<sup>7</sup>, Takayuki Kato<sup>7</sup>, Atsunori Oshima<sup>6,8</sup>, Kosuke Fujishima<sup>2,9</sup>, Laurent Blanchoin<sup>4,10</sup>, Akihiro Narita<sup>3\*</sup> & Robert C. Robinson<sup>1,11\*</sup>

## Affiliations

<sup>1</sup>Research Institute for Interdisciplinary Science, Okayama University, Okayama 700-8530, Japan.

<sup>2</sup>Tokyo Institute of Technology, Earth-Life Science Institute (ELSI), Tokyo, 152-8551, Japan.

<sup>3</sup>Division of Biological Science, Graduate School of Science, Nagoya University, Furo-cho, Chikusa-ku, Nagoya, 464-8601, Japan.

<sup>4</sup>University of Grenoble-Alpes, CEA, CNRS, INRA, Interdisciplinary Research Institute of Grenoble, Laboratoire de Physiologie Cellulaire & Végétale, CytoMorpho Lab, 38054 Grenoble, France.

<sup>5</sup>National Laboratory of Solid State Microstructure, Department of Physics, Collaborative Innovation Center of Advanced Microstructures, Nanjing University, 210093 Nanjing, China.

<sup>6</sup>Cellular and Structural Physiology Institute (CeSPI), Nagoya University, Furo-cho, Chikusa-ku, Nagoya 464-8601, Japan.

<sup>7</sup>Institute for Protein Research, Osaka University, Osaka, 565-0871, Japan.

<sup>8</sup>Department of Basic Medicinal Sciences, Graduate School of Pharmaceutical Sciences, Nagoya University, Furo-cho, Chikusa-ku, Nagoya 464-8601, Japan.

<sup>9</sup>Graduate School of Media and Governance, Keio University, Fujisawa, 252-0882, Japan.

<sup>10</sup>Université de Paris, INSERM, CEA, Institut de Recherche Saint Louis, U 976, CytoMorpho Lab, 75010 Paris, France

<sup>11</sup>School of Biomolecular Science and Engineering (BSE), Vidyasirimedhi Institute of Science and Technology (VISTEC), Rayong, 21210, Thailand.

\*Correspondence to: [br.okayama.u@gmail.com](mailto:br.okayama.u@gmail.com) and [narita.akihiro@f.mbox.nagoya-u.ac.jp](mailto:narita.akihiro@f.mbox.nagoya-u.ac.jp)

† Equal contributions.

36

37

## 38 **Abstract**

39 Tubulins are critical for the internal organization of eukaryotic cells, and understanding their  
40 emergence is an important question in eukaryogenesis. Asgard archaea are the closest known  
41 prokaryotic relatives to eukaryotes. Here, we elucidated the apo and nucleotide-bound X-ray  
42 structures of an Asgard tubulin from hydrothermal-living Odinararchaeota (OdinTubulin). The GTP-  
43 bound structure resembles a microtubule protofilament, with GTP bound between subunits,  
44 coordinating the “+” end subunit through a network of water molecules and unexpectedly by two  
45 cations. A water molecule is located suitable for GTP hydrolysis. Time course crystallography and  
46 electron microscopy revealed conformational changes on GTP hydrolysis. OdinTubulin forms  
47 tubules at high temperatures, with short curved protofilaments coiling around the tubule  
48 circumference, more similar to FtsZ, rather than running parallel to its length, as in microtubules.  
49 Thus, OdinTubulin represents an evolution intermediate between prokaryotic FtsZ and eukaryotic  
50 microtubule-forming tubulins.

51

## 52 **INTRODUCTION**

53 The tubulin/FtsZ/CetZ superfamily of proteins polymerize into filaments for which nucleotide-  
54 dependent dynamics and curvature are critical to their functions. The prokaryotic GTP-  
55 hydrolyzing FtsZ and CetZ form homo-filaments, which adopt straight and curved conformations  
56 (1–4). These filaments are part of the ring systems that constrict during prokaryotic cell division  
57 (5). The eukaryotic microtubule-forming tubulins have resulted from series of gene duplications  
58 (6), and have diverged significantly from FtsZ (7) and CetZ (2). The  $\gamma$ -tubulin ring complex  
59 patterns the microtubule (8), which typically comprises 13 parallel strands. Each straight strand  
60 (protofilament) nucleates from a single subunit of  $\gamma$ -tubulin via incorporation of the obligate  $\alpha/\beta$   
61 tubulin heterodimers (9). Thus, in the cell, the microtubule nucleation step is separated at  
62 microtubule organizing centers from other assembly and disassembly dynamics.  $\alpha$ -tubulin  
63 contains a non-exchangeable, non-hydrolyzing GTP-binding site (N-site), whereas  $\beta$ -tubulin (E-  
64 site) and  $\gamma$ -tubulin contain exchangeable and hydrolyzing GTP-binding sites. The switch from  
65 straight to curved protofilaments at microtubule + ends, following GTP hydrolysis, results in  
66 catastrophe disassembly (10, 11).

67 The Asgard archaea superphylum have been proposed to be the closest prokaryotic relatives to  
68 eukaryotes (12). Their genomes, which were mainly obtained from metagenomic studies, include  
69 genes which have homology to eukaryotic signature protein (ESP) encoding genes. These ESPs  
70 were previously thought to be exclusive to eukaryotes, before the genomic characterization of the  
71 first Asgard archaea, *Candidatus Lokiarchaeota* (13). Thus, Asgard archaea genomes have become  
72 valuable resources to understand pre-eukaryotic protein machineries at the functional level, such  
73 as the ESPs studied in actin dynamics (14–16) and membrane fusion (17). The *Candidatus*  
74 *Odinararchaeota* archaeon LCB\_4 (Odin) metagenome-assembled genome (MAG, GenBank  
75 accession number MDVT00000000.1) encodes two genes predicted to be FtsZ homologs  
76 (OLS17704.1 and OLS17546.1), and also possesses a single gene (OdinTubulin, OLS18786.1)  
77 that has greater homology to eukaryotic tubulin rather than to prokaryotic FtsZ (12). However, the  
78 properties of OdinTubulin are currently unknown.

79

80

## RESULTS

81

### X-ray structure of OdinTubulin

82

To address whether OdinTubulin is a genuine tubulin at the protein level, we expressed, purified, crystallized and determined the structure of OdinTubulin in the apo form, and bound to GTP or GDP (table S1 and fig. S1). Phylogenetic analysis, using structure alignment, confirmed that OdinTubulin has diverged significantly from FtsZ and CetZ, and branches in the same clade as eukaryotic tubulins (Fig. 1A) (12). Structure homology searches revealed that the GTP-bound OdinTubulin, refined at 1.62 Å (PDB 7EVB, capital letters refer to structures determined in this study) is most similar to  $\alpha$ - and  $\beta$ -tubulins within a microtubule, regardless of the nucleotide state within the microtubule, rather than to non-polymerized tubulin subunits, or to FtsZ or CetZ (Fig. 1B, and table S2). OdinTubulin shares ~35% sequence identity with the human  $\alpha$ - and  $\beta$ -tubulins. Within the crystal packing, OdinTubulin subunits are arranged as in a microtubule protofilament (fig. S1 and S2). Superimposition of the OdinTubulin lower subunit (-) onto a eukaryotic microtubule GDP-containing  $\beta$ -tubulin subunit (18) revealed that the position of the OdinTubulin upper subunit (+) aligned closely with the proximal  $\alpha$ -tubulin subunit from the microtubule protofilament (Fig. 1C) (18). By contrast, superimposition onto the microtubule structure containing a GTP mimetic in the  $\beta$ -tubulin subunit (11), or onto the  $\beta$ -tubulin subunit from the stathmin-bound curved protofilaments (19), aligned the  $\alpha$ -tubulin subunits poorly to the OdinTubulin upper subunit (fig. S3, table S3 and movie S1 to S3).

89

Similar to eukaryotic tubulin, OdinTubulin comprises an N-terminal domain (residues 1-202), and intermediate domain (residues 203-367) and a C-terminal domain (residues 368-424, Fig. 2A), as described for eukaryotic tubulin (9). The  $\alpha$ 7 helix and its preceding loop (blue) and the  $\alpha$ 8 helix and its preceding loop (red), which we term the “nucleotide sensor motif”, lies in the intermediate domain, connecting the nucleotide from the lower subunit (-) to the nucleotide in the upper subunit (+) (Fig. 2A and movie S4). In eukaryotes, the  $\alpha$ 7 helix is known to undergo a translation movement in response to the presence of different nucleotides and protofilament curvature (20). Taken together, these data indicate that the GTP-bound OdinTubulin crystals contain a straight microtubule-like tubulin protofilament stabilized by native nucleotide binding.

108

109

### GTP binding

110

Inspection of the nucleotide-binding site revealed that GTP is bound to the “E” site, with the guanine moiety interacting with the sidechains of Phe222 and Asn226 from the N-terminal region of the nucleotide sensor motif, and the gamma phosphate is bound to the mainchain amide nitrogen from Ala100 from the lower subunit (Fig. 2B). The C-terminal region of the nucleotide sensor motif, from the upper subunit, interacts indirectly with the GTP phosphate groups through a bonding network of cations and water molecules (Fig. 2, B and C). There are two GTP-bound cations. The commonly observed ion that bridges the beta and gamma phosphates (“1” in Fig. 2C) and a second ion that directly coordinates Asn246, Glu251 and the GTP gamma phosphate (“2” in Fig. 2C). Cation 2-stabilized Glu251 orders a water molecule (“c” in Fig. 2, B and C), which is also in bonding distance of Asp248 from the upper subunit, and to the mainchain amide nitrogen from His101 in the lower subunit. Water “c” is 4.1 Å from the GTP gamma phosphorous atom, suitably positioned for straight-line nucleophilic attack for hydrolysis (movie S5). The cation

121

122 binding sites (1 and 2) are promiscuous but, in the crystal structures, preferentially bind  $Mg^{2+}$  and  
123  $K^+/Na^+$ , respectively (fig. S4).

124

### 125 **Proposed hydrolysis mechanism**

126 The GTP-binding site arrangement indicates a probable hydrolysis mechanism, whereby and  
127 Asp248 and/or Glu251 activate the hydrolytic water “c”. The activated water will be directed by  
128 the mainchain amide nitrogen from His101 and the sidechain of Glu251, which may swivel while  
129 remaining bound to cation 2, resulting in nucleophilic attack on the gamma phosphorous atom,  
130 leading to hydrolysis (fig. S5). Another water molecule “h” is suitably placed to receive the  
131 hydrogen ion from the hydrolytic water (blue, Fig. 2C and movie S5). A crystal structure  
132 containing 100% GDP in the nucleotide-binding site (PDB 7EVE, refined at 2.0 Å) revealed that  
133 the phosphate ion is released following hydrolysis, and is replaced by three water molecules and  
134 the hydrolytic water binding site is occupied (Fig. 2D and movie S5), without eliciting significant  
135 conformational changes to the OdinTubulin protomer or protofilament structures (Fig. 2E and fig.  
136 S1). We propose that the exchange of the covalently bound  $\gamma$ -phosphate for three water molecules,  
137 following hydrolysis, results in weakening the binding between the upper and lower OdinTubulin  
138 subunits in this region, producing strain in the protofilament.

139

### 140 **Conformational changes on GTP hydrolysis**

141 Incubation of GTP-soaked crystals in the presence of  $Na^+$  over time resulted in an initial increase  
142 in the bound GDP:GTP ratio (3 days, Fig. 3) followed by a blurring of the electron density for the  
143 intermediate domain (2 months), indicating a slow structural transition within the crystals. A single  
144 GTP-soaked OdinTubulin crystal (5 mM GTP, 1 mM  $MgCl_2$  and 0.1 M KCl, 1h) was frozen and  
145 confirmed to contain a ratio of GTP:GDP of ~9:1 by X-ray crystallography. Subsequently, the  
146 crystal was thawed and re-equilibrated in crystallization conditions supplemented by 1 mM  $MgCl_2$ ,  
147 0.1 M KCl, and 0.2 mM sodium acetate in the absence of nucleotide (2 weeks at 20 °C), before  
148 being refrozen and the crystal structure determined (PDB 7F1B, refined at 2.40 Å). The resulting  
149 100% GDP-bound conformation represents a second class of OdinTubulin structure which is  
150 similar to structures we also determined in the apo state (PDB 7EVG, refined at 2.48 Å), or  
151 partially bound to background GDP that resulted from the purification protocol (~60%, PDB  
152 7EVH, refined at 2.50 Å; Fig. 2F, fig. S1 and S6, and movie S6). We interpret this alternate  
153 OdinTubulin conformation to be that after the structural transitions resulting from GTP hydrolysis  
154 to GDP, allowing for release of the nucleotide.

155

156 Comparison of apo/GDP-bound structure with the GTP-bound structure, revealed that the  
157 intermediate domain, including the nucleotide sensor motif, moves relative to the N-terminal and  
158 C-terminal domains (Fig. 2G and movie S7). This conformational change alters the interactions  
159 between protomer subunits and likely results in a curving of the protofilament, unless the straight  
160 form is stabilized by inter-protofilament interactions as observed for the central portion of the  
161 microtubule, or in the OdinTubulin crystal packing (fig. S2). By contrast the 100% GDP bound  
162 OdinTubulin (PDB 7EVE) adopts a GTP-like conformation stabilized by a different crystal  
163 packing (fig. S1 and S2). We interpret the 7EVE structure to be the GDP-bound strained structure  
164 prior to the conformational change. The role of the nucleotide sensor motif in allosterically linking

165 the occupancy of the nucleotide-binding site between adjacent protomers is likely twofold: firstly,  
166 in ensuring GTP-bound monomers are preferentially added to a growing filament, and secondly,  
167 in cooperatively coordinating the conformational change throughout a protofilament following  
168 hydrolysis and phosphate release.

169

## 170 **Conservation with microtubule-forming tubulins**

171 Since, the proposed hydrolytic and ion-binding residues from the nucleotide sensor motif are  
172 conserved between OdinTubulin and  $\alpha$ -tubulin (Fig. 4A), we propose that GTP hydrolysis in  
173 microtubules may proceed via the same mechanism involving two cations and a strained  
174 intermediate where the phosphate ion is released following hydrolysis and replaced by three water  
175 molecules (fig. S5). Support for this mechanism can be found in the structures of eukaryotic  
176 tubulins. A water molecule is found bound to  $\alpha$ -tubulin Glu254 in the sequestered  $\alpha/\beta$ -tubulin  
177 dimer (21), equivalent to the hydrolytic water bound to Glu251 in OdinTubulin (compare Fig. 4B  
178 and 4C).  $\alpha$ -tubulin Glu254 has been predicted to be involved in catalysis by comparison to the  
179 structure of FtsZ (22). The mainchain amide nitrogens of Ala99 and Gly100 ( $\beta$ -tubulin) adopt  
180 similar positions to Ala100 and His101 from the lower OdinTubulin subunit, which interact with  
181 the GTP  $\gamma$ -phosphate and water “c”, respectively (compare Fig. 2B and 2D).

182

183 Furthermore, in the 3.3 Å cryoEM structure of GDP-bound E-site microtubule (18) adopts a  
184 similar conformation around the nucleotide (compare Fig. 2B and 4D). However, identification of  
185 low molecular weight species, such as water molecules, has not been possible at the resolution of  
186 the microtubule EM maps. In the sequestered  $\alpha/\beta$ -tubulin dimer (21), the hydrolysis-activating  
187 residue Glu251 from OdinTubulin is substituted by a basic residue (Lys254) in  $\beta$ -tubulin, which  
188 places a positive charge in the same location as magnesium ion 2 (compare Fig. 2C and 4E). This  
189 results in a lack of hydrolytic activity by the  $\beta$ -tubulin in the N-site, but also indicates that a positive  
190 charge is acceptable, in eukaryotic tubulins, in bridging the carbonyl of Asn249 (Asn246 in  
191 OdinTubulin, Fig 2C) and the GTP gamma phosphate (Fig. 4E).

192

193 To add weight to the prediction that there is a common mechanism of hydrolysis between  
194 OdinTubulin and microtubules, we carried out molecular dynamics (MD) simulations on  
195 restrained  $\alpha/\beta$ -tubulin subunits at the “E” site interface in a background of magnesium, sodium,  
196 and potassium ions. In the 1  $\mu$ s simulation, a magnesium ion stably associated with the oxygen  
197 atoms from the  $\beta$  and  $\gamma$  GTP phosphates (Fig. 4F), similarly to the OdinTubulin crystal structure  
198 (Fig. 2C). Furthermore, a potassium or sodium ion quickly became within bonding distance of  
199 oxygen atom of the GTP  $\gamma$ -phosphate and a carboxyl atom of Glu254 (Fig. 4F), similar to cation 2  
200 in the OdinTubulin structure (Fig. 2C). We measured the occupancy of the ions at these sites during  
201 the simulation (Fig. 4G). The  $Mg^{2+}$  and  $K^+/Na^+$  binding sites, in interacting with GTP, were fully  
202 occupied during the simulation. Approximately, 40% of the time a  $K^+/Na^+$  occupied the bridging  
203 site between oxygen atom of the GTP  $\gamma$ -phosphate and a carboxyl atom of Glu254 (Fig. 4G).  
204 Finally, a water molecule was observed at 100% occupancy in bridging Glu254 (Glu251 in  
205 OdinTubulin) and the phosphorous atom of the GTP  $\gamma$ -phosphate (water “c” – bridge, Fig. 4G and  
206 2C). Taken together, the conservation in the important GTP-hydrolysis residues, which bind  
207 cations and the proposed hydrolytic water, combined with the occupancy of these sites in MD

208 simulations, reinforce the hypothesis that GTP hydrolysis proceeds through similar mechanism in  
209 OdinTubulin and microtubules that involves two cations.

210

### 211 **OdinTubulin filament assembly**

212 We observed the dynamics of OdinTubulin polymerization by interference reflection microscopy  
213 (IRM) (23). Unlike the sparse, straight, smoothly elongating microtubules (Fig. 5A and movie S8  
214 and S9), OdinTubulin tended to form wider bundles of filaments, under similar conditions (Fig.  
215 5B and movie S8 and S9). The elongation proceeded with a high rate of nucleation via  
216 polymerization and filament annealing. Lower concentrations of OdinTubulin led to shorter more  
217 uniform filaments, which could be assembled under a variety of cation conditions (Fig. 5, C to F  
218 and movie S8 and S9).

219 Observation of negatively stained polymers by electron microscopy (EM) indicated that two forms  
220 of polymer could be assembled. In the absence of  $Mg^{2+}$ , bundles of straight protofilaments  
221 assembled in solutions containing the monovalent cations,  $K^+$  or  $Na^+$  (Fig. 6A). Inclusion of  $Mg^{2+}$   
222 with a high concentration of  $Na^+$  led to a mixture of bundled protofilaments and tubules (Fig. 6A).  
223 By contrast,  $Mg^{2+}/K^+$  solutions, in the absence of  $Na^+$ , produced exclusively tubules (Fig. 6B).  
224 Since,  $K^+/Na^+$  and  $Mg^{2+}$  are able to bind to the GTP in OdinTubulin protofilaments (fig. S4), but  
225 hydrolysis is slow in the presence of  $Na^+$  and absence of  $Mg^{2+}$  (Fig. 3), we interpret the bundles to  
226 form from polymerized OdinTubulin protofilaments before significant GTP hydrolysis, whereas  
227 the tubules likely are formed simultaneously with GTP hydrolysis, allowing a structural transition  
228 to a curved morphology.

229

### 230 **Temperature dependence of filament formation**

231 OdinTubulin forms tubules with a diameter of ~100 nm in the presence of  $K^+/Mg^{2+}$  at 37 ° or 80  
232 °C, with thicker more regular structures formed at the higher temperature (Fig. 6B). Similar to  
233 microtubules (24), OdinTubulin tubules were not observed at 4 °C, rather immature rings formed  
234 that resemble templates for tubule formation (Fig. 6B). The thermostability of the OdinTubulin  
235 tubules is consistent with the temperature of the Yellowstone Lower Culex Basin hot spring (~70  
236 °C) from where *Candidatus Odinarchoeota archaeon* LCB\_4 MAG was sampled (25). Next, light  
237 scattering was used to monitor the polymerization. OdinTubulin (8  $\mu$ M) was observed to increase  
238 light scattering in the presence of  $Mg^{2+}$ -containing polymerization buffer without GTP, however  
239 the signal was noisy (fig. S7). Including GTP (0.7 mM) in the  $Mg^{2+}$ -containing polymerization  
240 buffer, led to a smooth increase in light scattering over a period of 30 mins, reaching a steady state,  
241 consistent with orderly polymerization (fig. S7). Polymerization was temperature dependent. The  
242 rate of polymerization increased from 24 °C to 65 °C (Fig. 7A), the temperature limits of the  
243 spectrometer.

244

### 245 **OdinTubulin tubule structure**

246 The OdinTubulin tubules are semi uniform but display sufficient homogeneity for calculation of  
247 low-resolution reconstructions from cryo-EM images (Fig. 7, B to G). The tubules are constructed  
248 from 2-5 layers of short discontinuous curved protofilaments that spiral around the wall of the  
249 tubule, approximately perpendicular to the tubule length into which the OdinTubulin crystal

250 structure was placed (Fig. 7, E and G). By contrast, straight protofilaments run along the length of  
251 eukaryotic microtubules (Fig. 7H). Tubules assembled at higher temperature (80 °C) appeared  
252 more uniform and contained 4-5 layers (Fig. 7, F and G) relative to tubules assembled at lower  
253 temperature (37 °C), which typically contained 2-3 layers (Fig. 7, D and E).

254

255 We propose that GTP hydrolysis and phosphate release in OdinTubulin protofilaments leads to  
256 curving, enabling assembly into tubules, and that the temperature dependence of polymerization  
257 can be understood at two levels. At the monomer level, a two-state thermodynamic equilibrium  
258 exists, the enthalpic-favoured apo/GDP-bound and the entropically-favored GTP-bound  
259 conformations. Elevated temperatures bias the monomer conformation towards the GTP-bound  
260 state and protofilament assembly. At the protofilament level, GTP hydrolysis and phosphate  
261 release rates will likely increase with temperature, favoring protofilament curving and tubule  
262 formation. This second mechanism explains the temperature dependence of the tubule geometries.  
263 The lower temperature structures (Fig. 7D), above the assembly temperature threshold, may result  
264 from incomplete hydrolysis in the protofilaments during tubule assembly. Odinararchaeota have yet  
265 to be isolated, thus the role of the OdinTubulin tubules is unknown. Due to their relatively large  
266 diameters (~100 nm), we speculate that these tubules may use the straight-to-curved protofilament  
267 transition to shape membranes. The ~100 nm diameter of OdinTubulin tubules compares to ~500  
268 nm diameter of *Candidatus* Prometheoarchaeum syntrophicum MK-D1, a Lokiarchaeon, which is  
269 the only Asgard archaeon to be isolated to date (15, 26). We hypothesize that duplication of an  
270 ancient FtsZ/CetZ gene allowed the OdinTubulin protomer and protofilament to evolve and adopt  
271 functions outside cell division.

272

## 273 **DISCUSSION**

274 OdinTubulin forms protomers and protofilaments most similar to eukaryotic microtubules, yet  
275 assembles into ring systems more similar to FtsZ (3), indicating that OdinTubulin may represent  
276 an evolution intermediate between FtsZ and microtubule-forming tubulins. We speculate that  
277 enlargement of cell size during eukaryogenesis, may have necessitated the emergence of stiffer  
278 tubules to navigate the increasing cellular distances, providing evolutionary pressure that would  
279 favor a switch from a malleable tubulin coil geometry to the stiffer parallel protofilament  
280 arrangement, seen in microtubules. Such, switches in filament suprastructure architecture, using  
281 similar protofilament assemblies, have occurred several times during actin-like and tubulin-like  
282 filament evolution (6, 27). Gene duplication of the prototypical tubulin gene will have allowed the  
283 divergence of  $\alpha$ - and  $\beta$ -tubulins to change tubule dynamics, and the straight-to-curved  
284 protofilament conformational change repurposed for catastrophe disassembly. Loss of GTP  
285 hydrolysis at the N-site in alternate subunits, due to the Glu-to-Lys substitution in the  $\beta$ -subunit  
286 (Fig. 4E), may have resulted in relatively less strain, cooperativity and sensing between subunits  
287 in the protofilament following hydrolysis, extending the transient stability of the straight form of  
288 the protofilaments in the early microtubule. Another gene duplication event allowed the emergence  
289 of  $\gamma$ -tubulin as a nucleation complex in a parallel scenario to actin gene duplication in the  
290 emergence of the ARP2/3 actin-filament nucleating complex (28).

291

292 Further evidence for OdinTubulin representing a record of the prototypical tubulin prior to the  
293 evolution into microtubule-forming tubulins can be found in sequence analysis. Comparison of a  
294 hybrid human  $\alpha/\beta$ -tubulin sequence, which includes the interface residues at the E-site from both  
295  $\alpha$ -tubulin and  $\beta$ -tubulin, increased the identity with OdinTubulin from 35% for  $\alpha$ -tubulin and  $\beta$ -  
296 tubulin to 38% for the hybrid sequence, indicating that OdinTubulin represents a reasonable model  
297 of eukaryotic tubulin prior to the gene duplications. Thus, tubulin is an example in evolution, in  
298 which gene duplication coupled with sequence variation, without significant structural change to  
299 the core protein component (the tubulin protomer), gave rise to a novel complex protein machine,  
300 the microtubule. The microtubule is essential to eukaryotic chromosome segregation and its  
301 emergence was likely a key event in eukaryogenesis. In summary, OdinTubulin appears to have  
302 the characteristics of a primordial tubulin before the transition into the eukaryotic microtubule-  
303 forming tubulins.

304

## 305 MATERIALS AND METHODS

306

### 307 Protein expression and purification

308 The *Escherichia coli* codon optimized gene encoding the Odinararchaeota tubulin protein  
309 (OLS18786.1) was synthesized and placed in the pSY5 vector which encodes an N-terminal HRV  
310 3C protease cleavage site and 8-histidine tag (14). The OdinTubulin mutation (H393D) was  
311 introduced using the Q5 Site Directed Mutagenesis Kit (New England BioLabs) according to the  
312 manufacturer's protocol. Plasmids were transformed into *E. coli* (DE3), the cells grown to a  
313 density of OD<sub>600</sub> = 0.8 and the protein expressed by induction with 0.5 mM isopropyl-D-1-  
314 thiogalactopyranoside (IPTG) at 18 °C overnight. After centrifugation, cell pellets were  
315 resuspended in binding buffer (20 mM HEPES, 500 mM NaCl and 1 mM TCEP, pH 7.5),  
316 supplemented with Triton X-100 (0.01%), protease inhibitor cocktail (Set III, EDTA-free,  
317 Calbiochem) and benzonase (2  $\mu$ l of 10,000 U/ $\mu$ l, Merck) or in EM binding buffer (100 mM PIPES,  
318 500 mM NaCl, 50 mM imidazole, 10 mM MgSO<sub>4</sub>, 2 mM EGTA, pH 6.9). Cells were lysed using  
319 an ultrasonic cell disrupter Vibra-Cell (Sonics). The protein was purified from the clarified  
320 supernatant using a Ni-NTA affinity chromatography column (HisTrap FF GE Healthcare) with  
321 binding buffer and eluted through on column cleavage with HRV 3C protease. Affinity purified  
322 protein was further purified by size-exclusion chromatography (16/60 Superdex 75 PG, GE  
323 Healthcare) in the gel filtration buffer (20 mM HEPES, pH 7.5, 150 mM NaCl, 1 mM TCEP, or  
324 for EM samples: 100 mM PIPES, pH 6.9, 150 mM NaCl, 1 mM MgSO<sub>4</sub>, 2 mM EGTA and 50  $\mu$ M  
325 GTP). Pure protein containing fractions were identified by SDS-PAGE, pooled and concentrated  
326 with 2000-10000 MWCO Vivaspinn concentrators (Vivascience), and flash frozen in liquid  
327 nitrogen in small aliquots, or used freshly.

328

### 329 Crystallization, structure determination, model building and refinement

330 Native OdinTubulin and H393D crystallization trials, at 5-15 mg/ml in 20 mM HEPES, pH 7.5,  
331 150 mM NaCl, 1 mM TCEP) were performed using the sitting-drop or vapour-diffusion methods  
332 with a precipitant solution (1:1) at 293 K. Native OdinTubulin crystals were formed in 0.1 M Bis-  
333 Tris, pH 7.5, 25 % w/v PEG 3350. These crystals diffracted X-rays poorly to 4 Å, however the  
334 resulting data set was amenable to successful molecular replacement using the *Sus scrofa*  $\beta$ -tubulin  
335 structure as a search model (PDB 6o2r, chain K) (18). Mutational analysis, of crystal contacts,  
336 identified a single amino acid substitution (H393D) that had improved diffraction to 2.5 Å, but did



337 not alter protofilament packing, however the nucleotide-binding site showed partial occupancy  
338 (7EVH, fig. S8 and table S1). Soaking of these crystals with GTP increased the diffraction limit  
339 and sharpened the electron density suitable for unambiguous structure determination (table S1).  
340 Crystals were frozen in the mother liquor. X-ray data were collected on RAYONIX MX-300 HS  
341 CCD detector on beamline TPS 05A (NSRRC, Taiwan, ROC) at  $\lambda = 1.0 \text{ \AA}$  or on BL41XU ( $\lambda = 1.0$   
342  $\text{ \AA}$ ) of SPring-8 on a Pilatus 6M detector.

343  
344 Data were indexed, scaled, and merged following standard protocols (16). Molecular replacement  
345 and refinement was carried out using PDB 6o2r chain K as the search model using standard  
346 methods to solve the 1.62  $\text{ \AA}$  structure 7EVB (table S1) (16). The identity of the bound nucleotide  
347 was assessed by refinement of GTP, GDP or a combination of GTP and GDP in the nucleotide-  
348 binding site. Subsequent soaks and alternate crystal structures are detailed in table S1.

### 349 **Polymerization assay**

351 Polymerization of native OdinTubulin or H393D (8  $\mu\text{M}$ ) was induced by the addition of GTP (0.7  
352 mM) in K-PIPES buffer (100 mM PIPES, pH 6.9, 0.5 mM EGTA, 0.5 mM  $\text{MgSO}_4$ , 10% (v/v)  
353 glycerol), total volume of 100  $\mu\text{l}$  at various temperatures. Absorption at 340 nm was used to  
354 measure an increase in light scattering consistent with polymerization in 96-well, clear, flat-  
355 bottomed plates (Corning, Nunc). The plates were equilibrated (30 min) to the appropriate  
356 temperatures prior to the assays. Changes in absorbance were monitored with an Infinite M Nano<sup>+</sup>  
357 plate reader (Tecan).

### 359 **Interference Reflection Microscopy (IRM)**

360 Glass cover slips and slides were cleaned 30 min in Hellmanex III (2% in water) at 60 °C with  
361 sonication, and rinsing in ultrapure water. Cover slips were dried using nitrogen gas flow. *In vitro*  
362 polymerization assays were performed using flow chambers with dimensions of  $3 \times 20 \times 0.07 \text{ mm}$   
363 (width  $\times$  length  $\times$  height) that were assembled with double-sided tape as the spacer from  $20 \times 20$   
364 mm cover slip and slide. Brain tubulin elongation assay: Seeds (in the mix) were elongated with a  
365 mix containing 15  $\mu\text{M}$  of tubulin at 30 °C in IRM buffer: 100 mM Pipes-K pH 6.9, 0.5 mM  $\text{MgSO}_4$ ,  
366 0.5mM EGTA supplemented with 0.7 mM GTP, an oxygen scavenger cocktail (20 mM DTT, 3  
367 mg/ml glucose, 20  $\mu\text{g/ml}$  catalase and 100  $\mu\text{g/ml}$  glucose oxidase) and 0.25% methyl cellulose  
368 (1,500 cP, Sigma). OdinTubulin was similarly polymerized by addition of 0.7 mM GTP in the  
369 IRM buffer at the protein concentrations and cation conditions indicated in Fig. 3.

370  
371 Non-labelled microtubules and non-labelled OdinTubulin filaments were imaged with IRM on an  
372 epifluorescence microscope (Eclipse Ti2, Nikon). The samples were illuminated with a SOLA  
373 Light Engine (Lumencor) through a cube equipped with a monochromatic filter at 520 nm, a 50/50  
374 dichroic mirror and a  $\times 60$  numerical aperture 1.49 TIRF objective. The microscope stage was kept  
375 at 30 °C using a warm stage controller (LCI). Images and movies were captured using an Orca  
376 flash 4LT camera (Hamamatsu) every 5 s for 30 min.

### 378 **Sequence and structure analyses**

379 Tubulin, FtsZ and CetZ structures were aligned in using PDB codes 1rlu, 1w5e, 2vam, 2vaw, 3zid,  
380 4b45, 4e6e, 4ffb, 5jco, 5mjs, 5n5n, 5ubq, 5w3j, 6e88, 6rvq, and 6unx. The resulting alignment was  
381 subjected to phylogenetic analysis using published methods (16). Structure comparisons were  
382 carried out using the Dali server (<http://ekhidna2.biocenter.helsinki.fi/dali/>).

383

384

### **MD simulations.**

385

386

387

388

389

390

391

392

393

394

395

396

397

398

399

400

401

402

### **Negative Staining of Odin Tubulin**

403

404

405

406

407

408

409

410

411

412

413

### **Cryo-EM grid preparation**

414

415

416

417

418

419

420

421

422

### **Cryo-EM data acquisition and image processing**

423

424

425

426

427

428

Frozen molybdenum cryo-EM grids were initially screened on a JEOL JEM-3000SFF electron microscope (Cellular and Structural Physiology Institute, Nagoya University) operated at 200 kV at minimal dose system. Images were recorded using a K2 Summit camera with exposure settings of 1.35 Å/pixel size. Grids were subsequently imaged on a Titan Krios (FEI), at the Institute for Protein Research, Osaka University, equipped with the FEG operated at 300 kV and a minimal dose system. Imaging was performed using the EPU software (FEI) or SerialEM software

429 (Nexperion) attached to the Titan Krios. Images of OdinTubulin incubated at 37 °C were recorded  
430 at nominal magnification of 47,000, without using objective aperture, nominal defocus range of -  
431 2.0 to -2.6  $\mu\text{m}$  with a dose rate of 40.05  $\text{e}^-/\text{\AA}^2$  and exposure time of 2.42 s. Images were recorded  
432 using a Falcon III detector (FEI) at a pixel size of 1.45  $\text{\AA}/\text{pixel}$  and a frame rate of  
433 60 frames/individual images. For incubation at 80 °C, two sessions of data collection at a  
434 magnification of 64,000, without objective aperture, defocus range of -2.0 to -2.4  $\mu\text{m}$  with a dose  
435 rate of 50  $\text{e}^-/\text{\AA}^2$  and exposure time of 5.21 seconds were used. Images were recorded with a K3  
436 summit detector (FEI) in counting mode at a pixel size of 1.11  $\text{\AA}/\text{pixel}$  and a frame rate of  
437 58 frames per image.

438  
439 1217 (for 37 °C) and 7600 (for 80°C) raw movies were collected and processed in RELION  
440 3.0/3.1.1 (36). Drift was motion corrected with MotionCor2 (37) and the CTF for each micrograph  
441 was estimated with CTFFind-4.1 (38). Micrographs with good observed CTF estimations were  
442 selected for further processing. Tubules were picked manually using EMAN2 e2heliboxer (39)  
443 and extracted in RELION 3.0/3.1.1 with a  $4 \times 4$  binning (box size of 250 x 250 pixels). Particles  
444 from 2D classes displaying clear and similar structure and radius were selected. The helical pitch  
445 of the coil was determined using the 2D classes. 3D classification was performed with a wide range  
446 of initial helical parameters using the helical pitch of the coil as a restriction. The 3D classes which  
447 had consistent projections with 2D classes and top views of the filaments were selected. Initial 3D  
448 reference models were prepared using RELION toolbox kit cylinder. Two rounds of 3D  
449 classification were performed. 3D refinement was performed with a reference model low pass  
450 filtered at 40  $\text{\AA}$  with solvent mask. Particles were re-extracted with a  $2 \times 2$  binning (box size of  
451 500 x 500 pixels) and the final 3D refinement was performed.

#### 452 453 **Model fitting**

454 In the crystals, the protofilaments are unable to bend due to the crystal packing. However,  
455 superimposing the apo-OdinTubulin (7EVG) onto two adjacent subunits from the GTP-bound  
456 protofilament (7EVB), via the C-terminal domains, led to a curved model that could be fitted into  
457 the EM density.

458

#### 459 **REFERENCES AND NOTES**

- 460 1. J. M. Wagstaff, M. Tsim, M. A. Oliva, A. García-Sánchez, D. Kureisaite-Ciziene, J. M.  
461 Andreu, J. Löwe, A Polymerization-Associated Structural Switch in FtsZ That Enables  
462 Treadmilling of Model Filaments. *mBio*. **8** (2017), doi:10.1128/mBio.00254-17.
- 463 2. I. G. Duggin, C. H. S. Aylett, J. C. Walsh, K. A. Michie, Q. Wang, L. Turnbull, E. M.  
464 Dawson, E. J. Harry, C. B. Whitchurch, L. A. Amos, J. Löwe, CetZ tubulin-like proteins  
465 control archaeal cell shape. *Nature*. **519**, 362–365 (2015).
- 466 3. D. Popp, M. Iwasa, H. P. Erickson, A. Narita, Y. Maeda, R. C. Robinson, Suprastructures  
467 and dynamic properties of Mycobacterium tuberculosis FtsZ. *J. Biol. Chem.* **285**, 11281–9  
468 (2010).
- 469 4. M. A. Oliva, S. C. Cordell, J. Lowe, Structural insights into FtsZ protofilament formation.  
470 *Nat. Struct. Mol. Biol.* **11**, 1243–50 (2004).

- 471 5. J. Errington, R. A. Daniel, D.-J. Scheffers, Cytokinesis in bacteria. *Microbiol Mol Biol Rev.*  
472 **67**, 52–65, table of contents (2003).
- 473 6. P. W. Gunning, U. Ghoshdastider, S. Whitaker, D. Popp, R. C. Robinson, The evolution of  
474 compositionally and functionally distinct actin filaments. *J. Cell Sci.* **128**, 2009–2019  
475 (2015).
- 476 7. J. Löwe, L. A. Amos, Crystal structure of the bacterial cell-division protein FtsZ. *Nature.*  
477 **391**, 203–206 (1998).
- 478 8. Y. Zheng, M. L. Wong, B. Alberts, T. Mitchison, Nucleation of microtubule assembly by a  
479 gamma-tubulin-containing ring complex. *Nature.* **378**, 578–583 (1995).
- 480 9. E. Nogales, S. G. Wolf, K. H. Downing, Structure of the alpha beta tubulin dimer by  
481 electron crystallography. *Nature.* **391**, 199–203 (1998).
- 482 10. R. B. G. Ravelli, B. Gigant, P. A. Curmi, I. Jourdain, S. Lachkar, A. Sobel, M. Knossow,  
483 Insight into tubulin regulation from a complex with colchicine and a stathmin-like domain.  
484 *Nature.* **428**, 198–202 (2004).
- 485 11. R. Zhang, B. LaFrance, E. Nogales, Separating the effects of nucleotide and EB binding on  
486 microtubule structure. *Proc. Natl. Acad. Sci. U. S. A.* **115**, E6191–E6200 (2018).
- 487 12. K. Zaremba-Niedzwiedzka, E. F. Caceres, J. H. Saw, D. Backstrom, L. Juzokaite, E.  
488 Vancaester, K. W. Seitz, K. Anantharaman, P. Starnawski, K. U. Kjeldsen, M. B. Stott, T.  
489 Nunoura, J. F. Banfield, A. Schramm, B. J. Baker, A. Spang, T. J. Ettema, Asgard archaea  
490 illuminate the origin of eukaryotic cellular complexity. *Nature.* **541**, 353–358 (2017).
- 491 13. A. Spang, J. H. Saw, S. L. Jorgensen, K. Zaremba-Niedzwiedzka, J. Martijn, A. E. Lind, R.  
492 van Eijk, C. Schleper, L. Guy, T. J. Ettema, Complex archaea that bridge the gap between  
493 prokaryotes and eukaryotes. *Nature.* **521**, 173–9 (2015).
- 494 14. C. Akil, R. C. Robinson, Genomes of Asgard archaea encode profilins that regulate actin.  
495 *Nature.* **562**, 439–443 (2018).
- 496 15. C. Akil, Y. Kitaoku, L. T. Tran, D. Liebl, H. Choe, D. Muengsaen, W. Suginta, A. Schulte,  
497 R. C. Robinson, Mythical origins of the actin cytoskeleton. *Curr Opin Cell Biol.* **68**, 55–63  
498 (2020).
- 499 16. C. Akil, L. T. Tran, M. Orhant-Prioux, Y. Baskaran, E. Manser, L. Blanchoin, R. C.  
500 Robinson, Insights into the evolution of regulated actin dynamics via characterization of  
501 primitive gelsolin/cofilin proteins from Asgard archaea. *Proc Natl Acad Sci U S A.* **117**,  
502 19904–19913 (2020).
- 503 17. E. Neveu, D. Khalifeh, N. Salamin, D. Fasshauer, Prototypic SNARE Proteins Are Encoded  
504 in the Genomes of Heimdallarchaeota, Potentially Bridging the Gap between the  
505 Prokaryotes and Eukaryotes. *Curr Biol.* **30**, 2468-2480.e5 (2020).

- 506 18. L. Eshun-Wilson, R. Zhang, D. Portran, M. V. Nachury, D. B. Toso, T. Löhr, M.  
507 Vendruscolo, M. Bonomi, J. S. Fraser, E. Nogales, Effects of  $\alpha$ -tubulin acetylation on  
508 microtubule structure and stability. *Proc Natl Acad Sci U S A*. **116**, 10366–10371 (2019).
- 509 19. A. E. Prota, K. Bargsten, D. Zurwerra, J. J. Field, J. F. Díaz, K.-H. Altmann, M. O.  
510 Steinmetz, Molecular Mechanism of Action of Microtubule-Stabilizing Anticancer Agents.  
511 *Science*. **339**, 587–590 (2013).
- 512 20. H. Aldaz, L. M. Rice, T. Stearns, D. A. Agard, Insights into microtubule nucleation from  
513 the crystal structure of human gamma-tubulin. *Nature*. **435**, 523–527 (2005).
- 514 21. G. La Sala, N. Olieric, A. Sharma, F. Viti, F. de Asis Balaguer Perez, L. Huang, J. R.  
515 Tonra, G. K. Lloyd, S. Decherchi, J. F. Díaz, M. O. Steinmetz, A. Cavalli, Structure,  
516 Thermodynamics, and Kinetics of Plinabulin Binding to Two Tubulin Isoforms. *Chem*. **5**,  
517 2969–2986 (2019).
- 518 22. K. H. Downing, E. Nogales, Crystallographic structure of tubulin: implications for  
519 dynamics and drug binding. *Cell Struct Funct*. **24**, 269–275 (1999).
- 520 23. M. Mahamdeh, S. Simmerts, A. Luchniak, E. Schäffer, J. Howard, Label-free high-speed  
521 wide-field imaging of single microtubules using interference reflection microscopy. *J*  
522 *Microsc*. **272**, 60–66 (2018).
- 523 24. G. G. Borisy, J. B. Olmsted, R. A. Klugman, In Vitro Aggregation of Cytoplasmic  
524 Microtubule Subunits. *Proc Natl Acad Sci U S A*. **69**, 2890–2894 (1972).
- 525 25. B. J. Baker, J. H. Saw, A. E. Lind, C. S. Lazar, K.-U. Hinrichs, A. P. Teske, T. J. G.  
526 Ettema, Genomic inference of the metabolism of cosmopolitan subsurface Archaea,  
527 Hadesarchaea. *Nat Microbiol*. **1**, 16002 (2016).
- 528 26. H. Imachi, M. K. Nobu, N. Nakahara, Y. Morono, M. Ogawara, Y. Takaki, Y. Takano, K.  
529 Uematsu, T. Ikuta, M. Ito, Y. Matsui, M. Miyazaki, K. Murata, Y. Saito, S. Sakai, C. Song,  
530 E. Tasumi, Y. Yamanaka, T. Yamaguchi, Y. Kamagata, H. Tamaki, K. Takai, Isolation of  
531 an archaeon at the prokaryote-eukaryote interface. *Nature*. **577**, 519–525 (2020).
- 532 27. S. Jiang, U. Ghoshdastider, A. Narita, D. Popp, R. C. Robinson, Structural complexity of  
533 filaments formed from the actin and tubulin folds. *Commun Integr Biol*. **9**, e1242538  
534 (2016).
- 535 28. R. C. Robinson, K. Turbedsky, D. A. Kaiser, J. B. Marchand, H. N. Higgs, S. Choe, T. D.  
536 Pollard, Crystal structure of Arp2/3 complex. *Science*. **294**, 1679–84 (2001).
- 537 29. M. J. Abraham, T. Murtola, R. Schulz, S. Páll, J. C. Smith, B. Hess, E. Lindahl,  
538 GROMACS: High performance molecular simulations through multi-level parallelism from  
539 laptops to supercomputers. *SoftwareX*. **1–2**, 19–25 (2015).

- 540 30. J. A. Maier, C. Martinez, K. Kasavajhala, L. Wickstrom, K. E. Hauser, C. Simmerling,  
541 ff14SB: Improving the Accuracy of Protein Side Chain and Backbone Parameters from  
542 ff99SB. *J. Chem. Theory Comput.* **11**, 3696–3713 (2015).
- 543 31. W. L. Jorgensen, J. Chandrasekhar, J. D. Madura, R. W. Impey, M. L. Klein, Comparison  
544 of simple potential functions for simulating liquid water. *J. Chem. Phys.* **79**, 926–935  
545 (1983).
- 546 32. K. L. Meagher, L. T. Redman, H. A. Carlson, Development of polyphosphate parameters  
547 for use with the AMBER force field. *Journal of Computational Chemistry.* **24**, 1016–1025  
548 (2003).
- 549 33. B. Hess, H. Bekker, H. J. C. Berendsen, J. G. E. M. Fraaije, LINCS: A linear constraint  
550 solver for molecular simulations. *Journal of Computational Chemistry.* **18**, 1463–1472  
551 (1997).
- 552 34. R. T. McGibbon, K. A. Beauchamp, M. P. Harrigan, C. Klein, J. M. Swails, C. X.  
553 Hernández, C. R. Schwantes, L.-P. Wang, T. J. Lane, V. S. Pande, MDTraj: A Modern  
554 Open Library for the Analysis of Molecular Dynamics Trajectories. *Biophysical Journal.*  
555 **109**, 1528–1532 (2015).
- 556 35. D. R. Drummond, S. Kain, A. Newcombe, C. Hoey, M. Katsuki, R. A. Cross, Purification  
557 of tubulin from the fission yeast *Schizosaccharomyces pombe*. *Methods Mol Biol.* **777**, 29–  
558 55 (2011).
- 559 36. J. Zivanov, T. Nakane, B. O. Forsberg, D. Kimanius, W. J. Hagen, E. Lindahl, S. H.  
560 Scheres, New tools for automated high-resolution cryo-EM structure determination in  
561 RELION-3. *Elife.* **7** (2018), doi:10.7554/eLife.42166.
- 562 37. S. Q. Zheng, E. Palovcak, J.-P. Armache, K. A. Verba, Y. Cheng, D. A. Agard,  
563 MotionCor2: anisotropic correction of beam-induced motion for improved cryo-electron  
564 microscopy. *Nat Methods.* **14**, 331–332 (2017).
- 565 38. A. Rohou, N. Grigorieff, CTFFIND4: Fast and accurate defocus estimation from electron  
566 micrographs. *J Struct Biol.* **192**, 216–221 (2015).
- 567 39. G. Tang, L. Peng, P. R. Baldwin, D. S. Mann, W. Jiang, I. Rees, S. J. Ludtke, EMAN2: an  
568 extensible image processing suite for electron microscopy. *J. Struct. Biol.* **157**, 38–46  
569 (2007).

570

571 **Acknowledgements:** We thank the Synchrotron Radiation Protein Crystallography Facility of the  
572 National Core Facility Program for Biotechnology, Ministry of Science and Technology and the  
573 National Synchrotron Radiation Research Center, a national user facility supported by the Ministry  
574 of Science and Technology, Taiwan, ROC, and the SPring-8 Synchrotron, Japan. EM screening  
575 and data collection was supported by the Japan Agency for Medical Research and Development  
576 (AMED) Grant Number JP20am0101074 (A.O.) and the Collaborative Research Program of

577 Institute for Protein Research, Osaka University (CENCR-20-20). We thank Esra Balıkcı for  
578 technical support. **Funding:** This work was supported by JST CREST, grant number  
579 JPMJCR19S5, Japan (S.A., A.N., R.C.R); Japan Society for the Promotion of Science (JSPS),  
580 grant number JP20H00476; and by the Moore-Simons Project on the Origin of the Eukaryotic Cell,  
581 grant number GBMF9743. K.F. is supported by ELSI-First Logic Astrobiology Donation Program.  
582 **Author contributions:** C.A., S.A., A.N., L.B. and R.C.R. conceived experiments and analyzed  
583 data. C.A., S.A., and L.T.T performed biochemical experiments. C.A., L.T.T and R.C.R.  
584 conducted X-ray experiments. J.G. performed I.R.M. experiments and W.L. conducted MD  
585 simulations. S.A., A.N., A.O. and K.H. conducted EM experiments. A.N., K.F., L.B. and R.C.R.  
586 supervised the work. R.C.R. wrote the manuscript. All authors edited the manuscript. **Competing**  
587 **interests:** Authors declare no competing interests. **Data and materials availability:** The atomic  
588 coordinates and structure factors have been deposited in the Protein Data Bank under the accession  
589 codes: 7EVB-D, 7EVG-L and 7F1A-B. All other data are available in the main text or the  
590 supplementary materials.

591

## 592 **Supplementary Materials:**

593 Figures S1-S8

594 Tables S1-S3

595 Movies S1-S9

596

597  
598

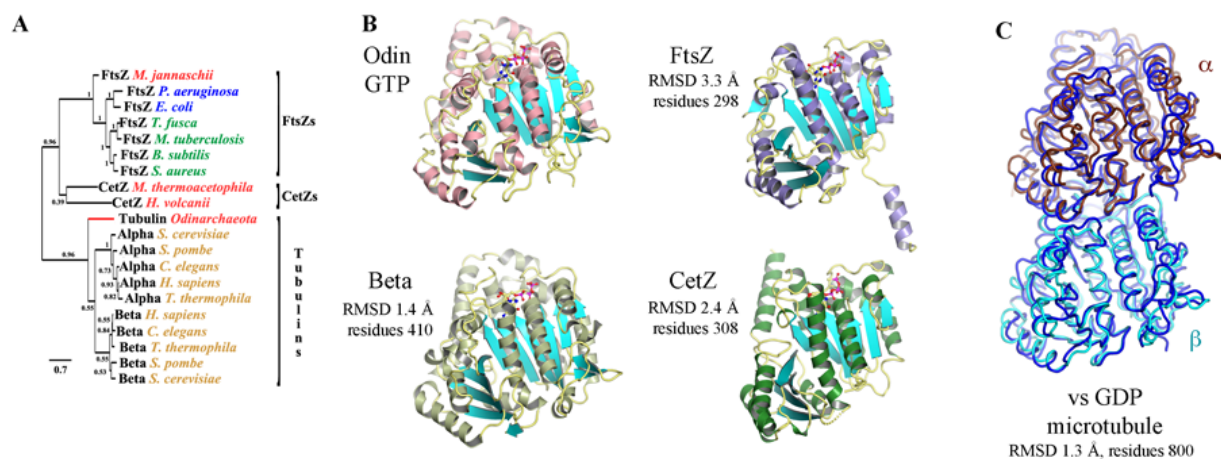

599

600 **Fig. 1. The crystal structure of OdinTubulin.** (A) Phylogenetic analysis of OdinTubulin from  
601 structure-based sequence alignment in comparison to the prokaryotic cell division proteins, FtsZ  
602 and CetZ, and the eukaryotic microtubule-forming tubulins. (B) Comparison of the protomer  
603 structures of GTP-bound OdinTubulin (PDB 7EVB) to  $\beta$ -tubulin (PDB 6o2r) (18), CetZ (PDB  
604 4b45) (2) and FtsZ (PDB 1w5a) (4). The matching numbers of residues and RMSD values indicate  
605 the relative structural similarities to OdinTubulin. (C) Superimposition of the two GTP-bound  
606 OdinTubulin symmetry-related subunits from the crystal packing (dark blue) onto two subunits of  
607 eukaryotic tubulin from the GDP-bound microtubule (PDB 6o2r) (18).  
608



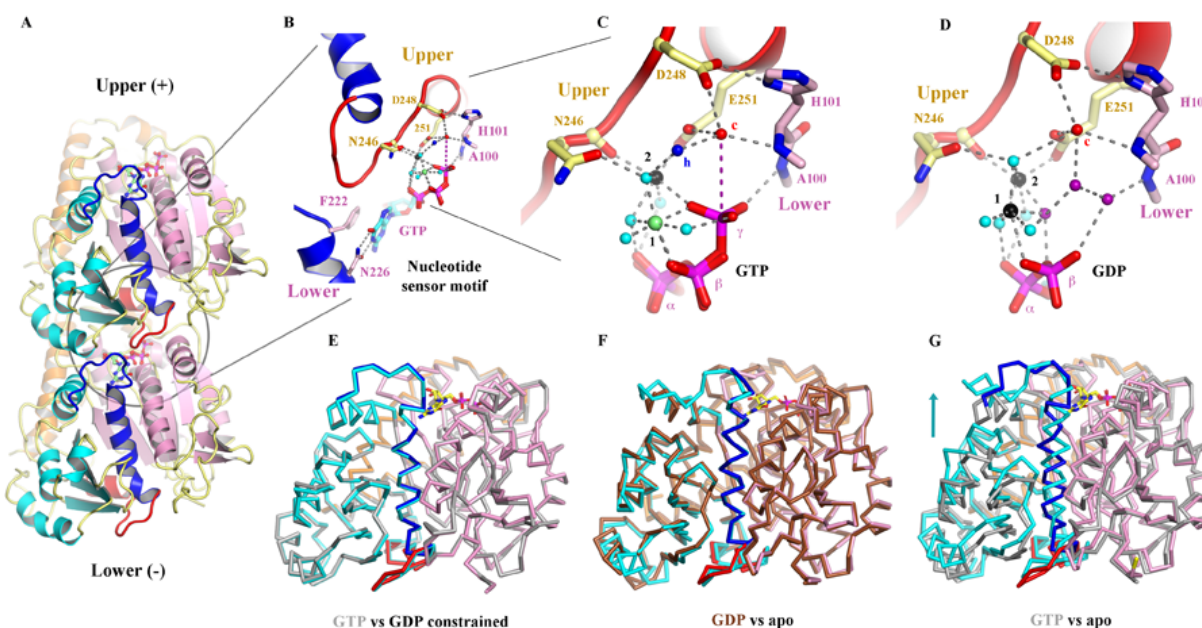

609

610 **Fig. 2. Structural implications for GTP hydrolysis.** (A) The OdinTubulin protofilament in the  
611 crystal packing (PDB 7EVB). Two subunits of OdinTubulin are depicted. The  $\alpha 7$  helix and  
612 preceding loop (blue) and  $\alpha 8$  helix and preceding loop (red) comprise the nucleotide sensor motif,  
613 which connect the upper and lower GTP-binding sites (sticks). Secondary structure elements are  
614 colored by domain: N-terminal (pink), intermediate (cyan), and C-terminal (orange). The  
615 nucleotide sensor motif lies within the intermediate domain. See movie S4. (B) Enlargement of  
616 the GTP interactions. Only part of each nucleotide sensor motif is shown for clarity. Selected  
617 residues from the upper and lower subunits are labelled in yellow and pink, respectively. (C)  
618 Enlargement of the interactions around the GTP  $\gamma$ -phosphate. Black, lime green and cyan spheres  
619 indicate  $\text{Na}^+$ ,  $\text{Mg}^{2+}$  (numbered in black) and water molecules, respectively. The proposed  
620 hydrolytic water is shown as a red sphere and labeled “c”, and water molecule suitably placed to  
621 receive the hydrogen ion from the hydrolytic water is labeled “h” in blue. The purple dashed line  
622 indicates the route for nucleophilic attack on the GTP  $\gamma$ -phosphate. See movie S5. (D) The same  
623 region from the GDP-bound structure (PDB 7EVE). Three water molecules (purple) replace the  
624 GTP  $\gamma$ -phosphate, and both cations are assigned as  $\text{Na}^+$  based on bond distances and crystallization  
625 condition. See movie S5. (E-G) Superimposition of protomer structures. (E) GTP-bound  
626 OdinTubulin (grey, PDB 7EVB) overlaid on the constrained GDP-bound structure (colored, PDB  
627 7EVE). (F) The unconstrained GDP-bound OdinTubulin (grey, PDB 7EVB) overlaid on the apo  
628 structure (colored, PDB 7EVG). (G) GTP-bound OdinTubulin (grey, PDB 7EVB) overlaid on the  
629 apo structure (colored, PDB 7EVG). The arrow highlights the conformational change for the  
630 intermediate domain. See movie S7.

631

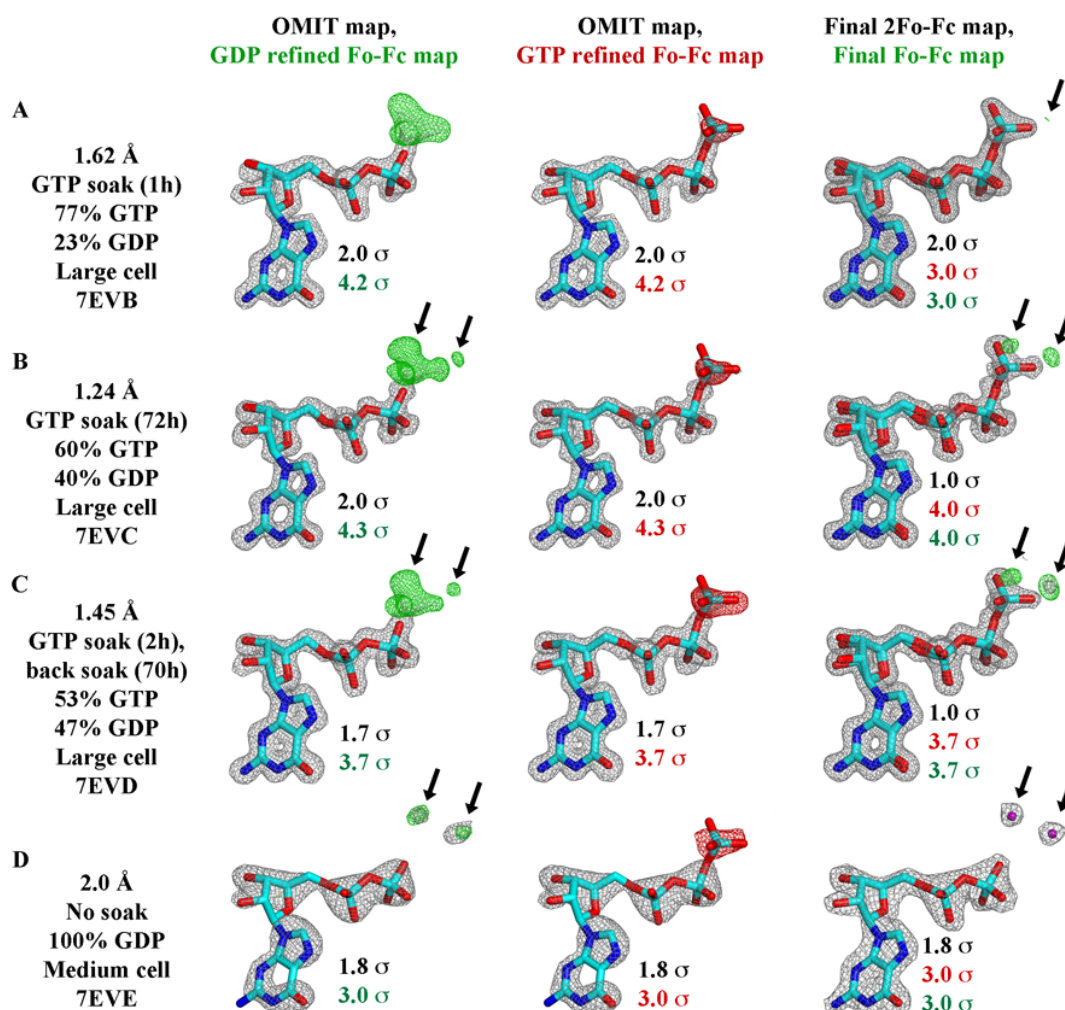

632

633 **Fig. 3. GTP hydrolysis followed by X-ray crystallography.** Structures determined (A) 1 h or  
 634 (B) 72 h after soaking with 10 mM GTP showed a decrease in the bound GTP:GDP ratio. (C) Back  
 635 soaking the crystals for 70 h, decreased the ratio further. (D) The structure of a non-soaked crystal  
 636 with 100% GDP bound to OdinTubulin arranged in the regular protofilament packing, similar to  
 637 the GDP-bound subunits within a microtubule, which is stabilized by a different crystal unit cell  
 638 (fig. S1 and S2). The maps are contoured at levels indicated by the color-coded sigma levels. Left  
 639 column, the structures were refined with GDP in the nucleotide-binding site. Middle column, the  
 640 structures were refined with GTP in the nucleotide-binding site. Left column, the structures were  
 641 refined with final GTP/GDP ratios in the nucleotide-binding sites. Green (+) and red (-) Fo-Fc  
 642 density indicate the need for more or less atoms, respectively. The arrows indicate the position of  
 643 two ordered water molecules that appears following  $\gamma$ -phosphate release after hydrolysis, which  
 644 are shown in purple (D, right). The third ordered water molecule (Fig. 2D), which appears after  
 645 hydrolysis, is bound to the metal ions and occupies a similar position to an oxygen from the GTP  
 646  $\gamma$ -phosphate. Thus, this water does not appear in the difference maps. This water has weaker  
 647 electron density compared to the two waters detailed in this figure, and likely partial occupancy  
 648 (movie S5).

649

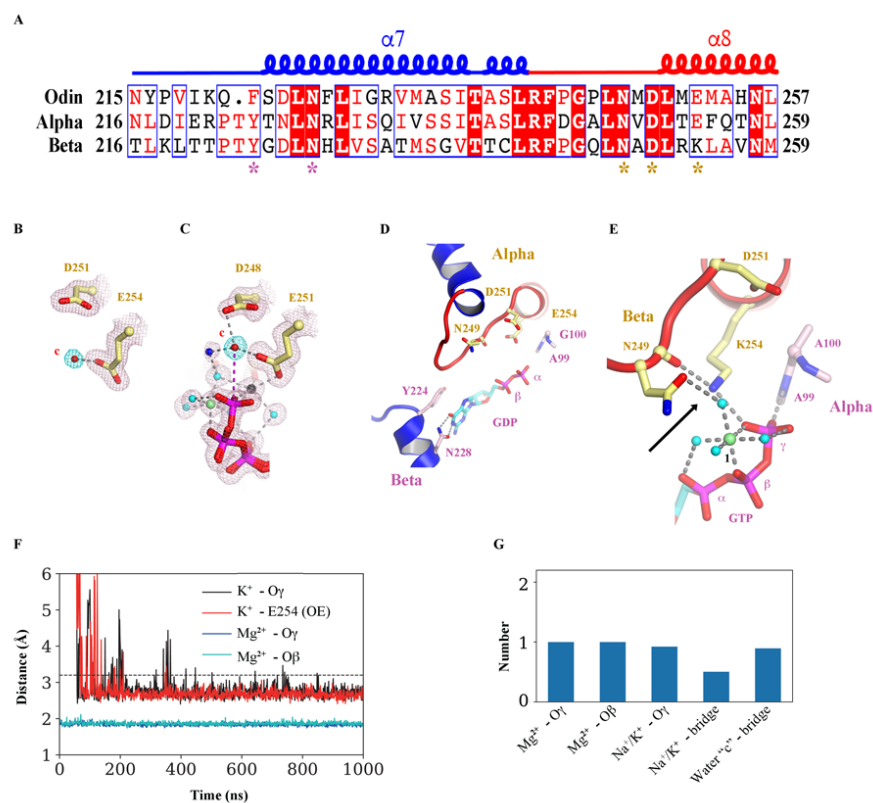

650

651

652

653

654

655

656

657

658

659

660

661

662

663

664

665

666

667

668

669

670

**Fig. 4. Similarities in OdinTubulin and microtubule nucleotide interactions.** (A) Conservation in the sequence of the nucleotide sensor motif from OdinTubulin and human  $\alpha$ - and  $\beta$ -tubulins. Colored stars below the alignment indicate the residues highlighted in Fig. 2, B to D and this Fig. (B to E). (B) A water molecule is found bound to  $\alpha$ -tubulin Glu254 in the sequestered  $\alpha/\beta$ -tubulin dimer (PDB 6s8k), equivalent to (C) the hydrolytic water “c” bound to Glu251 in OdinTubulin. The 2Fo-Fc electron density maps contoured at 1  $\sigma$  (pink) and the density around potential hydrolytic water (cyan). (D) Subunits within a GDP-bound microtubule (PDB 6o2r) in a similar conformation to Fig. 2B showing structural similarity. (E)  $\beta$ -tubulin interactions with bound-GTP  $\alpha$ -tubulin (PDB 6s8k) in a similar orientation to Fig. 2C. The cation-bound, hydrolysis-guiding residue Glu251 from OdinTubulin is substituted by a basic residue (Lys254, indicated by the arrow) in  $\beta$ -tubulin. (F) Coordination of metal ions in molecular dynamics simulations at the GTP exchangeable site of a microtubule for a representative. A magnesium ion is stably coordinated via oxygen atoms from GTP  $\beta$  (cyan) and  $\gamma$  (blue) phosphates throughout the 1  $\mu$ s simulation. K<sup>+</sup> becomes associated with an oxygen atom from the GTP  $\gamma$ -phosphate (black) and Glu254 (red). Similar results were obtained when Na<sup>+</sup> became coordinated at the same site. (G) Occupancies of the metal ions at each site during the simulation. Stable occupancies of the GTP-bound Mg<sup>2+</sup> and K<sup>+</sup> or Na<sup>+</sup> were observed. Approximately half the time the K<sup>+</sup> or Na<sup>+</sup> were jointly coordinated by the GTP  $\gamma$ -phosphate and Glu254 (Na<sup>+</sup>/K<sup>+</sup> bridge). Finally, a water molecule(s) was located at position “c” between Glu254 and the phosphorous atom of the GTP  $\gamma$ -phosphate (water “c” – bridge).

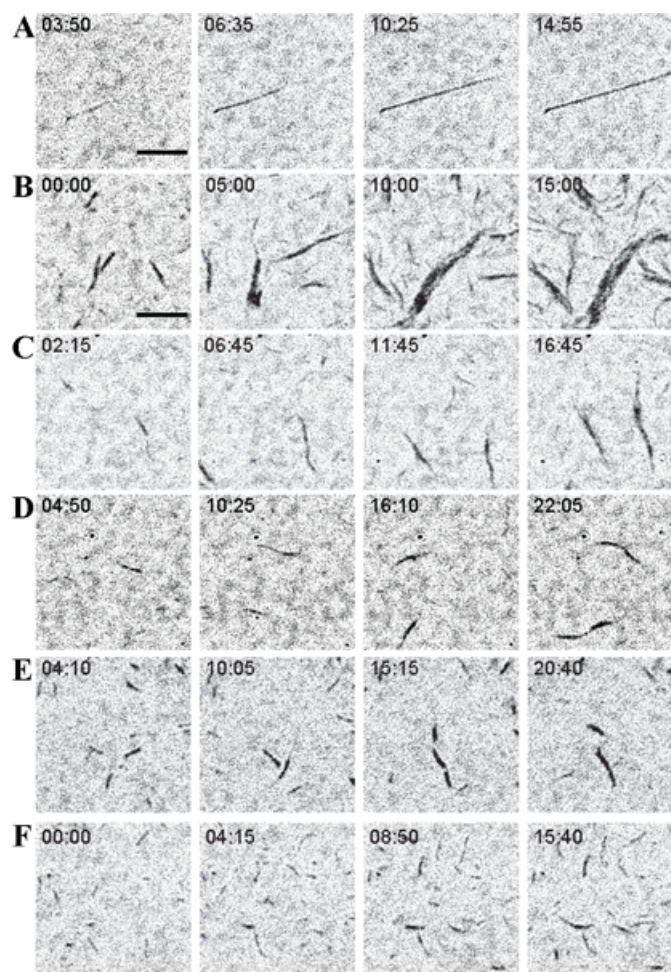

671

672 **Fig. 5. Polymerization of OdinTubulin followed by IRM.** (A) Elongation of tubulin (15  $\mu$ M)  
673 into microtubules in 100 mM Pipes-K, pH 6.9, 0.5 mM MgSO<sub>4</sub>, 0.5 mM EGTA, 10% glycerol,  
674 0.7 mM GTP. (B-D) Polymerization of OdinTubulin at 6  $\mu$ M, 2  $\mu$ M and 1  $\mu$ M, respectively, under  
675 the same solution conditions. (E) Polymerization of OdinTubulin (0.5  $\mu$ M) in 100 mM Pipes-K,  
676 pH 6.9, 100 mM NaCl, 0.5 mM EGTA, 0.7 mM GTP or (F) supplemented with 0.5 mM MgSO<sub>4</sub>.  
677

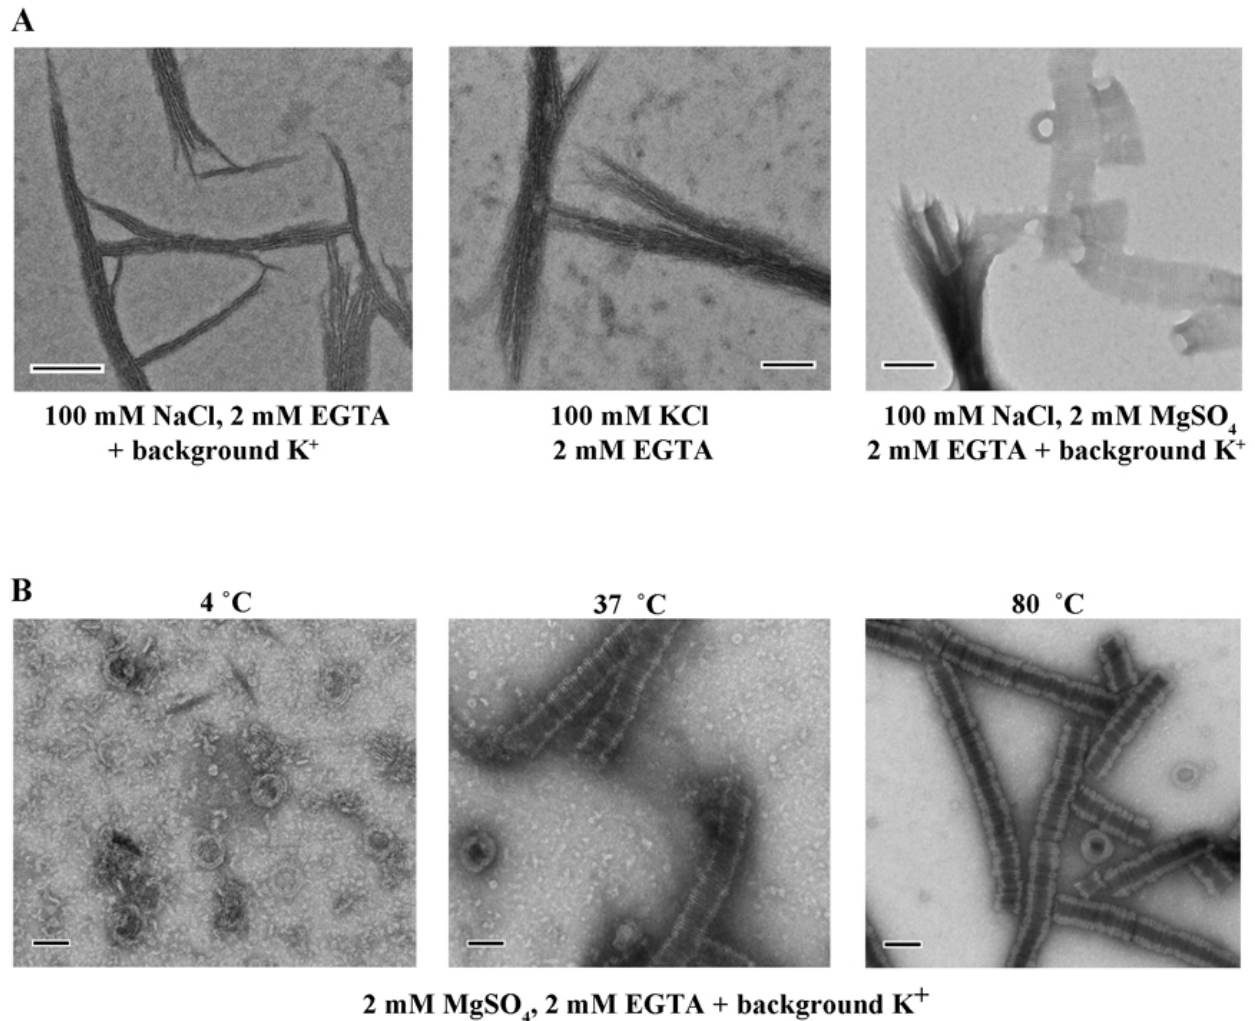

678

679

680

681

682

683

684

**Fig. 6. Screening of OdinTubulin assembly conditions observed by EM of negatively stained samples.** A) Two morphologies of filaments were observed. Bundles of straight filaments appeared in solutions of monovalent cations (K<sup>+</sup> or Na<sup>+</sup>). Mixtures of the two forms were observed in mixtures Mg<sup>2+</sup> with high concentrations of Na<sup>+</sup>. B) The temperature dependence of tubule assembly. Tubules dominated in the presence of Mg<sup>2+</sup> and absence of Na<sup>+</sup> at higher temperatures. Scale bar = 100 nm.

685

686

687

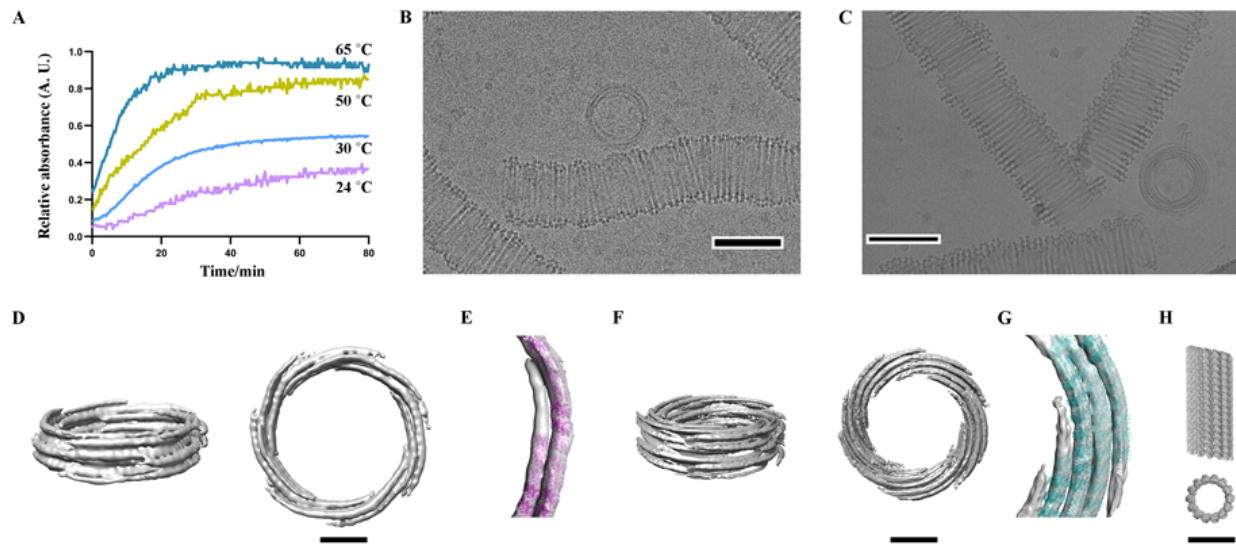

688

689

690 **Fig. 7. OdinTubulin tubule architecture.** (A) OdinTubulin (8  $\mu\text{M}$ ) polymerization monitored  
691 light scattering at different temperatures. (B) Cryo-electron micrograph of OdinTubulin (40  $\mu\text{M}$   
692 or 60  $\mu\text{M}$ ) polymerized at 37 °C and (C), at 80 °C, respectively. Scale bar indicates 100 nm. (D)  
693 Two orientations of the 3D reconstruction at 3 nm resolution of OdinTubulin polymerized at 37  
694 °C. (E) The crystal structure fitted into the reconstruction. (F) Two orientations of the 3D  
695 reconstruction at 4 nm resolution of OdinTubulin polymerized at 80 °C, and (G) with the fitted  
696 model. (H) Two views of the eukaryotic microtubule (11). Scale bar in D-H indicates 25 nm.

## Supplementary Materials for

### **Structure and dynamics of *Odinarchaeota tubulin* and the implications for eukaryotic microtubule evolution**

Caner Akıl<sup>1,2†</sup>, Samson Ali<sup>1,3†</sup>, Linh T. Tran<sup>1†</sup>, Jeremie Gaillard<sup>4</sup>, Wenfei Li<sup>5</sup>, Kenichi Hayashida<sup>6</sup>, Mika Hirose<sup>7</sup>, Takayuki Kato<sup>7</sup>, Atsunori Oshima<sup>6,8</sup>, Kosuke Fujishima<sup>2,9</sup>, Laurent Blanchoin<sup>4,10</sup>, Akihiro Narita<sup>3\*</sup> & Robert C. Robinson<sup>1,11\*</sup>

Correspondence to: [br.okayama.u@gmail.com](mailto:br.okayama.u@gmail.com) and [narita.akihiro@f.mbox.nagoya-u.ac.jp](mailto:narita.akihiro@f.mbox.nagoya-u.ac.jp)

#### **This PDF file includes:**

Fig. S1 to S8  
Tables S1 to S3  
Captions for movies S1 to S9

#### **Other Supplementary Materials for this manuscript include the following:**

Movies S1 to S9

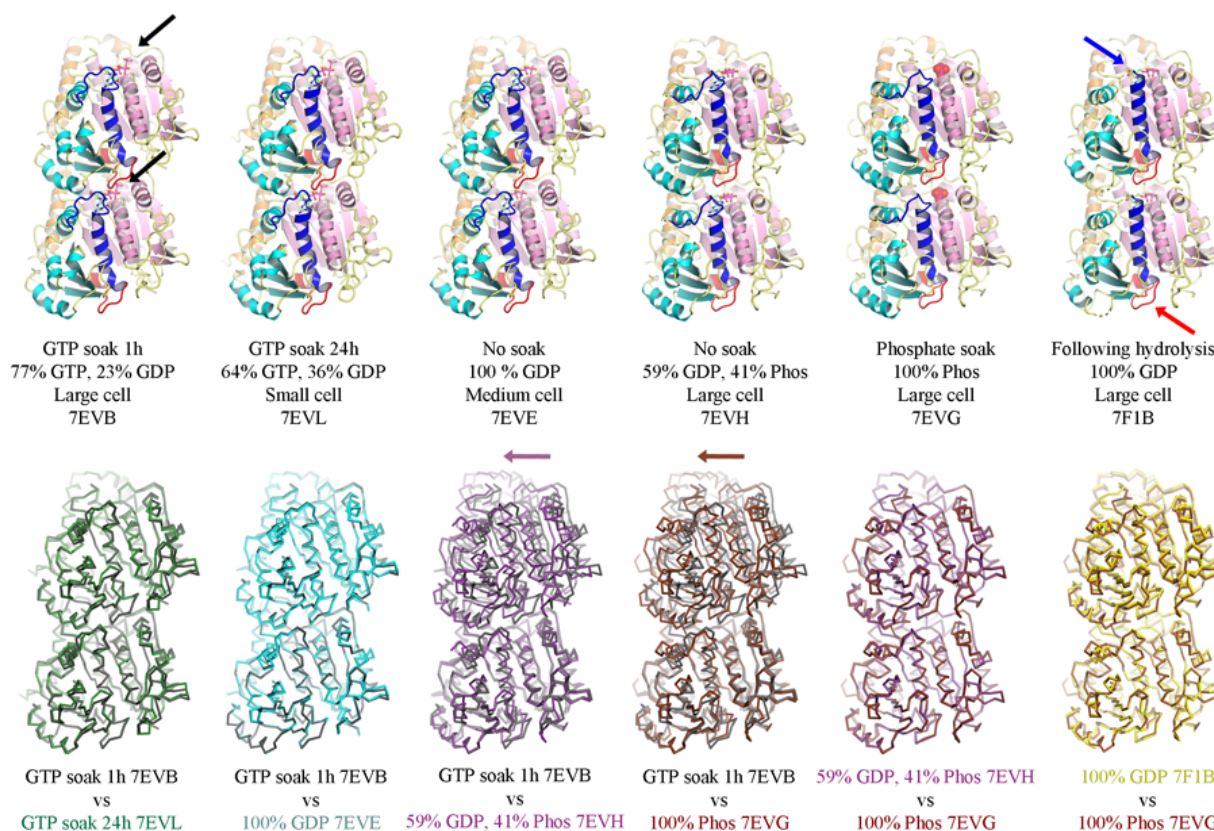

**Fig. S1. Six classes of OdinTubulin crystals and structures from this study.** Top row: Two copies of the structures from adjacent asymmetric units in the crystals, which form protofilaments (7EVB, 7EVL and 7EVE) or pseudo-protofilaments (7EVH, 7EVG and 7F1B). Secondary structure elements are colored by domain: N-terminal (pink), intermediate (cyan), and C-terminal (orange). The nucleotide sensor motif (red and blue, indicated by arrows on the right structure) lies within the intermediate domain. The nucleotides are shown as sticks and highlighted by black arrows in the left structure. Free phosphate is shown as spheres. Lower row: superimposition of structures indicating two arrangements. The protofilament forming structures (7EVB, 7EVL and 7EVE) and the pseudo-protofilaments forming structures (7EVH, 7EVG and 7F1B). Arrows indicate the shift between the protofilament- and pseudo-protofilaments-forming structures. The shift away from the protofilament arrangement likely occurs due the curved form of the protofilament being incompatible with the translational symmetry of the crystal, leading to a translation, rather than a curving in the restrained crystal environment. The other five structures from soaked crystals (7EVC, 7EVD, 7EVI, 7EVK and 7F1A) adopt the large cell protofilament crystal form, similar to 7EVB.



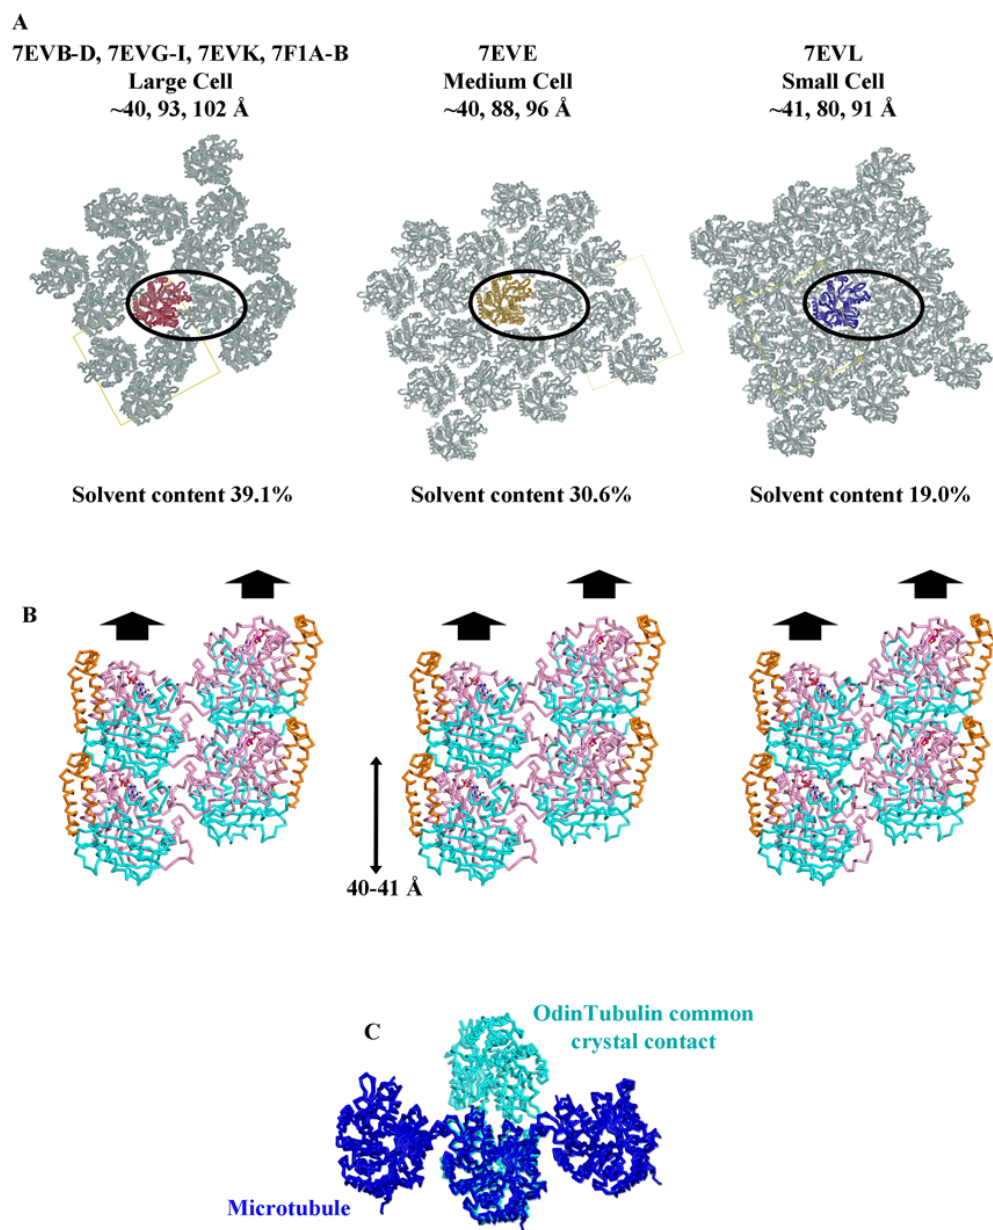

**Fig. S2. Packing in OdinTubulin crystals.** (A, B) The three classes of cell dimension, all in space group  $P2_12_12_1$ . In each arrangement, the crystal forms from the staggered association of two parallel protofilaments (circled in A), or pseudo protofilaments, with different solvent contents. (A) top view, (B) side view with the bold arrows indicating the protofilaments or pseudo protofilaments. In B) the domains are colored N-terminal (pink), intermediate (cyan), and C-terminal (orange). (C) Comparison of the staggered association of two parallel OdinTubulin protofilaments (cyan) from the crystals with three adjacent subunits around a microtubule (blue). We do not interpret the staggered association of the two parallel OdinTubulin protofilaments in the crystal packing to have physiological relevance, since the arrangement it is not found in the EM structures.

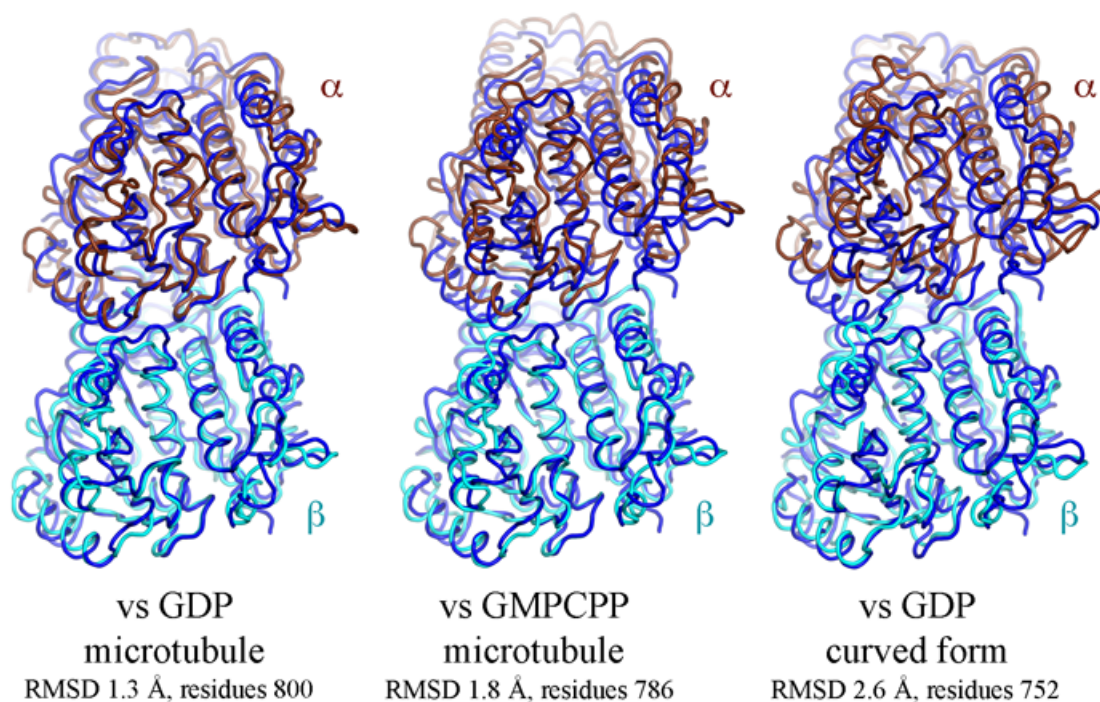

**Fig. S3. Comparison of OdinTubulin protofilaments with eukaryotic tubulin.** Superimposition of the two GTP-bound OdinTubulin symmetry-related subunits from the crystal packing (dark blue) onto two subunits of eukaryotic tubulin from the GDP-bound microtubule (PDB 6o2r) (Eshun-Wilson et al., 2019), the guanosine-5'-[( $\alpha,\beta$ )-methylene]triphosphate (GMPPCP)-bound microtubule (PDB 6dpu) (Zhang et al., 2018), and the stathmin-bound curved protofilament (PDB 4iij) (Prota et al., 2013).  $\alpha$ - and  $\beta$ -tubulins are shown in brown and cyan, respectively. The RMSD statistics indicate the structural similarity of the  $\alpha/\beta$ -tubulin heterodimer to the pair OdinTubulin subunits. See table S3 and movie S1 to S3.

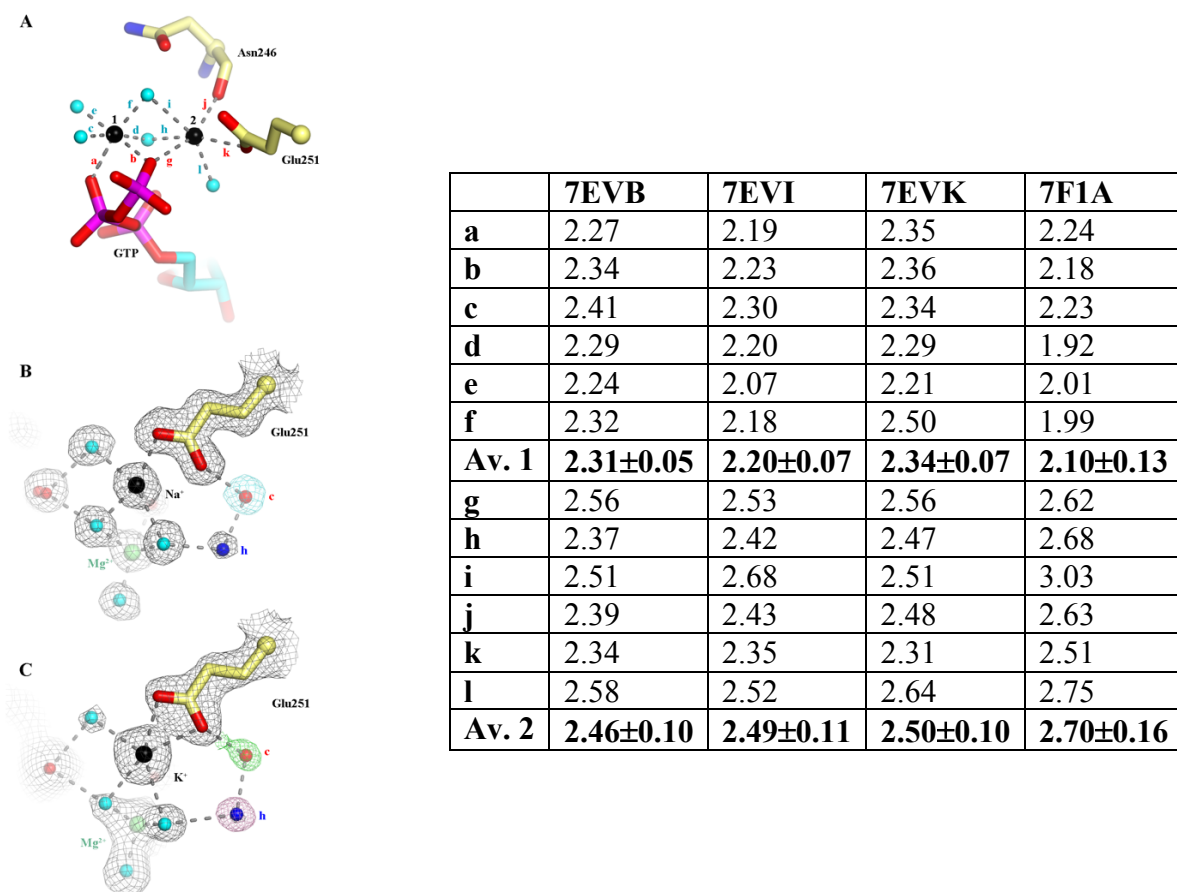

**Fig. S4. The identity of the two cations.** The octahedral geometry (A) and bond lengths (table) of the cations. In structure 7EVB, in 200 mM sodium acetate, both cations are likely to be sodium, or have mixed occupancy resulting from background cations. The average bond lengths (Av.) of cation 1 are significantly shorter than for ion 2. Structure 7EVI was soaked with 2 mM MgCl<sub>2</sub> and 200 mM sodium acetate (1 h), which reduced the bond lengths for cation 1 to 2.2 Å, typical for Mg<sup>2+</sup>, while those for cation 2 remained unaffected. Structure 7EVK was soaked with 2 mM EGTA, 100 mM KCl, 200 mM NaCl (1 h) to remove any divalent cations and to determine whether the bond lengths increased due occupancy by K<sup>+</sup>. The bond lengths slightly increased, indicating that both cation-binding sites can accept monovalent cations. Structure 7F1A was soaked with 2 mM MgCl<sub>2</sub> and 200 mM KCl (1 h) and had bond lengths consistent with Mg<sup>2+</sup> and K<sup>+</sup>. Thus, the Mg<sup>2+</sup> is the preferred cation at site 1, and site 2 is a monovalent cation binding site, preferentially occupied by K<sup>+</sup>/Na<sup>+</sup>, under the conditions tested. (B) The relationship between Na<sup>+</sup> in site 2 (7EVI) and the proposed hydrolytic and hydrogen-receiving waters, c and h. The atoms are surrounded by the OMIT map contoured at 1 σ (grey) and highlighted for atom c (cyan). (C) Similar representation for the Mg<sup>2+</sup>/K<sup>+</sup> soak (7F1A). The K<sup>+</sup> coordination appears to be pentagonal bipyramidal, the coordination increased by E251 providing double coordination. This has ramifications for the occupancies of the c and h waters. h is barely visible, and c not visible in the OMIT map (grey), but refine in the 2Fo-Fc map (1 σ), green and pink, respectively. Thus, the exact positioning of E251 effects the c and h waters, consistent with its proposed role in hydrolysis.

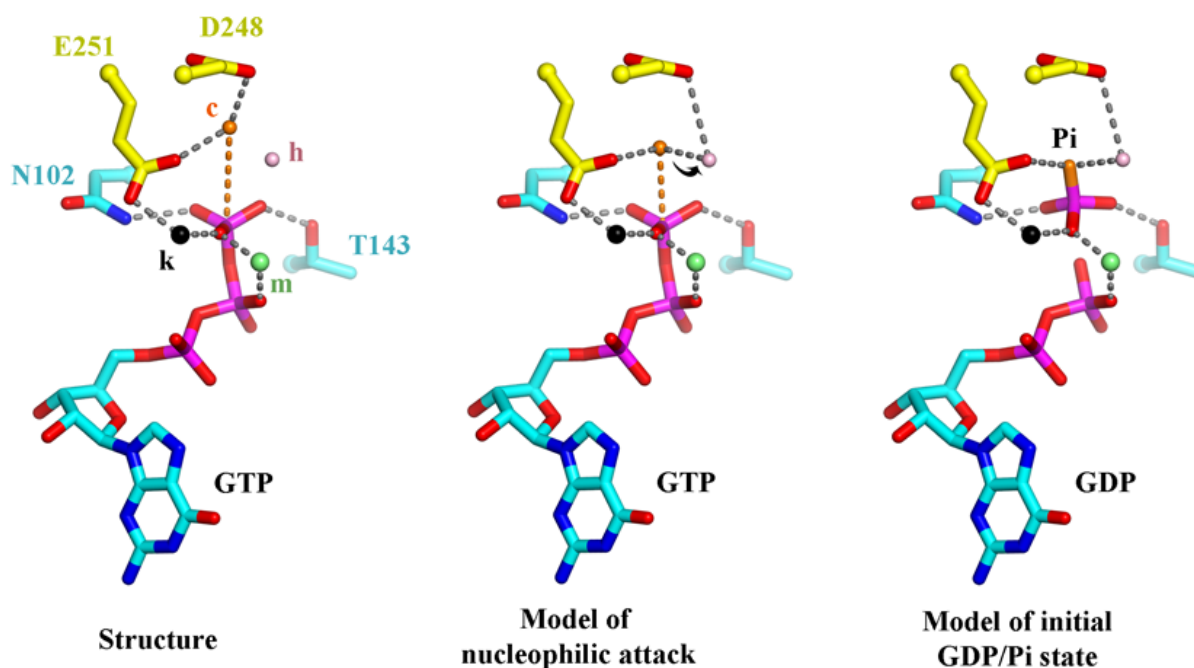

**Fig. S5. Hypothetical model of GTP hydrolysis in OdinTubulin.** Left, Structure 7EVI is shown with the residues and ions that stabilize the GTP  $\gamma$ -phosphate. c, hydrolytic water; h, hydrogen ion receiving water; m, magnesium ion; k, potassium or sodium ion. In the crystal structure water c is 4.1 Å from the GTP  $\gamma$ -phosphate phosphorous atom. Middle, to initiate hydrolysis the hydrolytic water (orange) is required to approach the GTP  $\gamma$ -phosphate phosphorus atom, along the orange dashed line, likely losing a hydrogen ion to the hydrogen ion receiving water (pink), indicated by the arrow. Left, after hydrolysis the dissociated  $\gamma$ -phosphate ion will receive a hydrogen ion, possibly from a surrounding water molecule or from Thr143.

The long distance of water c is 4.1 Å from the GTP  $\gamma$ -phosphate phosphorous atom may be due to two reasons. Firstly, a trivial reason that the H393D mutation may slightly increase the distance (fig. S8). Secondly, the extended distance may be part of the cooperative conformational changes within a protofilament. We hypothesize that protofilaments initially as straight protofilaments. Stochastic fluctuations in the water c position may then initiate hydrolysis in one or more subunits, which in turn may be propagated by the allosteric motion of the nucleotide sensor motif to produce concerted hydrolysis and conformational change throughout the protofilament.

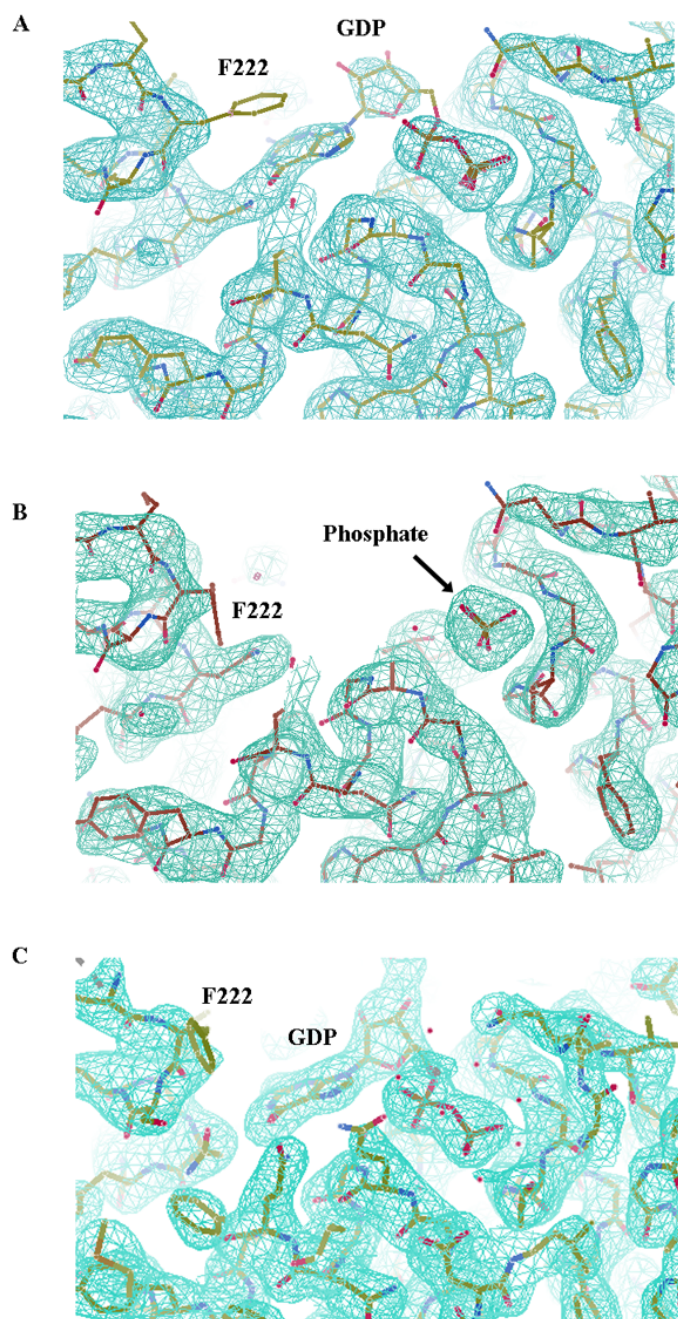

**Fig. S6. The second conformation of OdinTubulin.** The OMIT maps contoured at  $1\sigma$  for the alternate conformation of OdinTubulin bound to (A) 60% GDP and 40% phosphate (7EVH), (B) 100% phosphate (7EVG) or (C) 100% GDP (7F1B) from hydrolysis reaction carried out within the crystal. Phe222, which forms phi:phi stacking with nucleotide in the other conformation (Fig. 2B) is disordered in these structures, providing the mechanism for nucleotide dissociation.

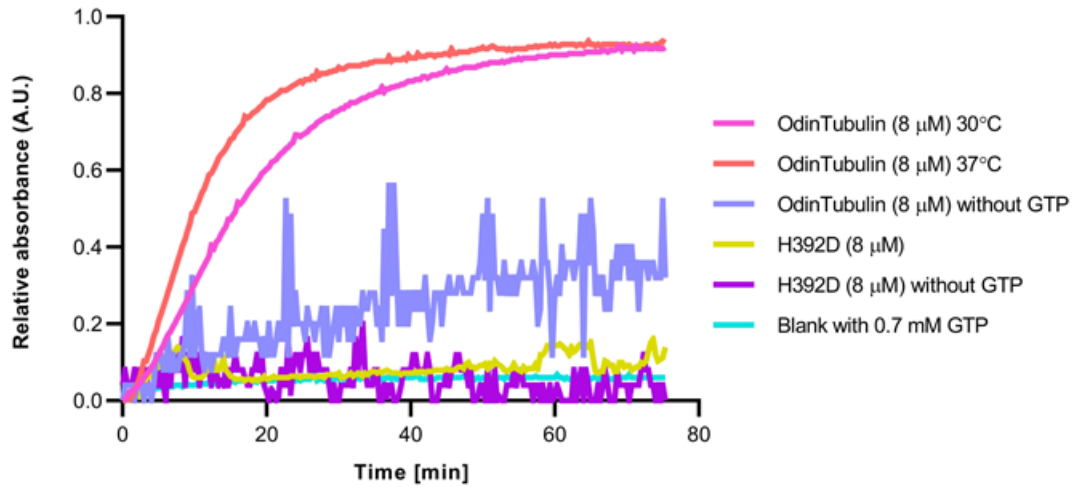

**Fig. S7. Polymerization of OdinTubulin.** Light scattering profiles for native and H392D mutant OdinTubulin (8  $\mu$ M) on polymerization with and without GTP.

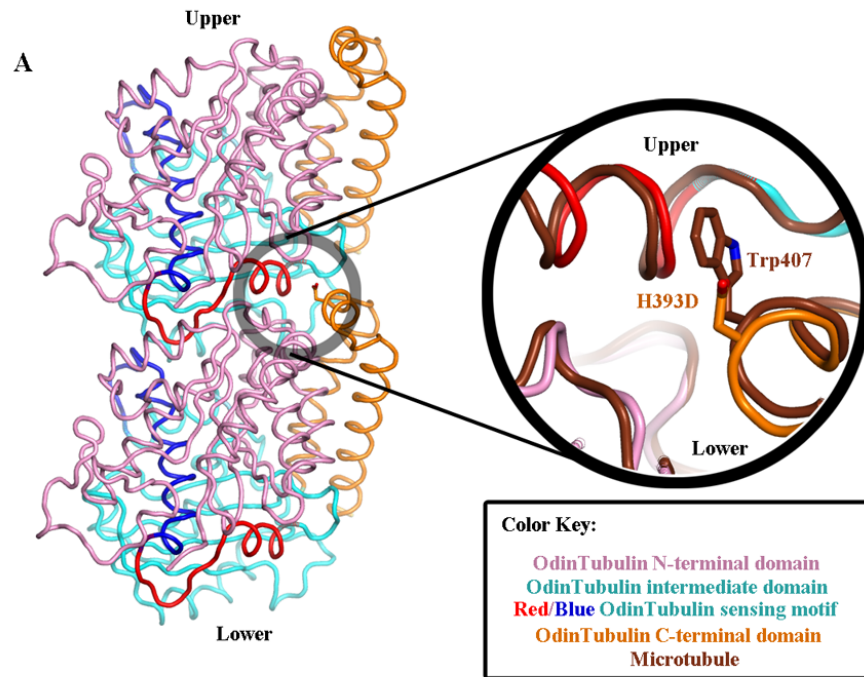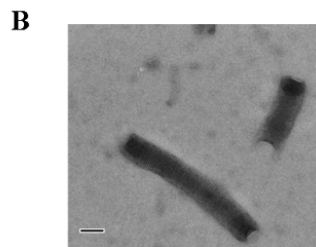

**Fig. S8. The OdinTubulin H393D mutation.** A) The H393D mutation in OdinTubulin lies at the edge of the packing between two subunits within the protofilament. The enlargement demonstrates that this mutation does not significantly affect the packing between the subunits in comparison to the microtubule protofilament packing (brown). B) Light scattering showed reduced assembly of the H393D OdinTubulin mutant (fig. S7). Observation of negatively stained samples H393D OdinTubulin mutant tubules by EM demonstrated that tubules of the mutant form in a similar morphology to the wild type protein, however the assembly efficiency is lower.

**Table S1. Crystallization and X-ray data collection and refinement statistics.**

|                                                     | OdinTubulin<br>77% GTP, 23% GDP<br>2 Na <sup>+</sup><br>PDB code 7EVB      | OdinTubulin<br>60% GTP, 40% GDP<br>2 Na <sup>+</sup><br>PDB code 7EVC | OdinTubulin<br>53% GTP, 47% GDP<br>2 Na <sup>+</sup><br>PDB code 7EVD | OdinTubulin<br>100% GDP<br>2 Na <sup>+</sup><br>PDB code 7EVE |
|-----------------------------------------------------|----------------------------------------------------------------------------|-----------------------------------------------------------------------|-----------------------------------------------------------------------|---------------------------------------------------------------|
| <b>Crystals</b>                                     |                                                                            |                                                                       |                                                                       |                                                               |
| Lattice                                             | P2 <sub>1</sub> 2 <sub>1</sub> 2 <sub>1</sub>                              | P2 <sub>1</sub> 2 <sub>1</sub> 2 <sub>1</sub>                         | P2 <sub>1</sub> 2 <sub>1</sub> 2 <sub>1</sub>                         | P2 <sub>1</sub> 2 <sub>1</sub> 2 <sub>1</sub>                 |
| <i>a</i> , <i>b</i> , <i>c</i> (Å)                  | 40.3, 92.3, 103.0                                                          | 40.2, 92.2, 102.9                                                     | 40.4, 92.1, 102.8                                                     | 41.1 88.4 95.5                                                |
| <i>α</i> , <i>β</i> , <i>γ</i> (°)                  | 90.0, 90.0, 90.0                                                           | 90.0, 90.0, 90.0                                                      | 90.0, 90.0, 90.0                                                      | 90.0, 90.0, 90.0                                              |
|                                                     | Large cell                                                                 | Large cell                                                            | Large cell                                                            | Medium cell                                                   |
| Crystallization conditions <sup>a</sup>             | 20% PEG 3350<br>0.2 M sodium acetate,<br>0.1 M Bis-Tris propane,<br>pH 8.5 | 25% PEG 1500<br>0.1 M MMT<br>pH 9.0                                   | 25% PEG 1500<br>0.1 M MMT<br>pH 9.0                                   | 25% PEG 1500<br>0.1 M MMT<br>pH 9.0                           |
| Soak                                                | 10 mM GTP (1 h)                                                            | 10 mM GTP (72 h)                                                      | 10 mM GTP (2 h)<br>then no GTP (70 h)                                 | No soak                                                       |
| <b>Data collection</b>                              |                                                                            |                                                                       |                                                                       |                                                               |
| Beamline                                            | TPS 05A, NSRRC                                                             | TPS 05A, NSRRC                                                        | TPS 05A, NSRRC                                                        | BL41XU, SPring-8                                              |
| Wavelength (Å)                                      | 1.0                                                                        | 1.0                                                                   | 1.0                                                                   | 1.0                                                           |
| Resolution (Å)                                      | 27.0-1.62 (1.65-1.62)                                                      | 20.0-1.25 (1.27-1.25)                                                 | 20.0-1.45 (1.47-1.45)                                                 | 37.0-2.00 (2.05-2.00)                                         |
| <i>R</i> <sub>merge</sub>                           | 5.0 (47.9)                                                                 | 9.3 (37.6)                                                            | 11.4 (59.3)                                                           | 11.4 (57.4)                                                   |
| <i>R</i> <sub>meas</sub>                            | 5.4 (54.4)                                                                 | 10.2 (47.9)                                                           | 11.9 (71.3)                                                           | 13.2 (67.4)                                                   |
| <i>R</i> <sub>rim</sub>                             | 2.0 (25.1)                                                                 | 4.0 (29.1)                                                            | 3.5 (38.7)                                                            | 6.5 (34.0)                                                    |
| <i>I</i> / <i>σ</i> ( <i>I</i> )                    | 27.6 (1.6)                                                                 | 24.5 (1.7)                                                            | 34.2 (1.0)                                                            | 8.6 (2.8)                                                     |
| <i>CC</i> <sub>1/2</sub>                            | (0.838)                                                                    | (0.744)                                                               | (0.554)                                                               | (0.439)                                                       |
| Completeness (%)                                    | 97.9 (85.6)                                                                | 97.7 (79.7)                                                           | 98.8 (86.1)                                                           | 85.4 (86.9)                                                   |
| Redundancy                                          | 6.5 (3.7)                                                                  | 5.9 (2.2)                                                             | 10.9 (2.8)                                                            | 3.5 (3.6)                                                     |
| <b>Refinement</b>                                   |                                                                            |                                                                       |                                                                       |                                                               |
| Resolution (Å)                                      | 26.4-1.62 (1.68-1.62)                                                      | 14.1-1.25 (1.30-1.25)                                                 | 19.9-1.45 (1.5-1.45)                                                  | 36.5-2.00 (2.07-2.00)                                         |
| No. reflections                                     | 48680 (4310)                                                               | 104198 (8756)                                                         | 67742 (5906)                                                          | 19817 (1982)                                                  |
| <i>R</i> <sub>work</sub> / <i>R</i> <sub>free</sub> | 15.3/17.7 (22.8/26.6)                                                      | 17.1/18.7 (23.9/26.2)                                                 | 15.2/17.6 (24.5/28.4)                                                 | 21.1/25.3 (30.0/33.8)                                         |
| Protein                                             | 3523                                                                       | 3594                                                                  | 3523                                                                  | 3537                                                          |
| Nucleotide                                          | 60                                                                         | 60                                                                    | 60                                                                    | 28                                                            |
| Nucleotide site                                     | 77% GTP, 23% GDP                                                           | 60% GTP, 40% GDP                                                      | 53% GTP, 47% GDP                                                      | 100% GDP                                                      |
| Ions                                                | 2 Na <sup>+</sup>                                                          | 2 Na <sup>+</sup>                                                     | 2 Na <sup>+</sup>                                                     | 2 Na <sup>+</sup>                                             |
| Water                                               | 349                                                                        | 409                                                                   | 379                                                                   | 148                                                           |
| <b><i>B</i> factors</b>                             |                                                                            |                                                                       |                                                                       |                                                               |
| Protein                                             | 20.3                                                                       | 14.0                                                                  | 19.4                                                                  | 29.2                                                          |
| Ligands                                             | 13.8                                                                       | 7.6                                                                   | 11.9                                                                  | 18.4                                                          |
| Water                                               | 33.7                                                                       | 29.4                                                                  | 34.4                                                                  | 29.4                                                          |
| <b>r.m.s deviations</b>                             |                                                                            |                                                                       |                                                                       |                                                               |
| Bond lengths (Å)                                    | 0.006                                                                      | 0.005                                                                 | 0.015                                                                 | 0.002                                                         |
| Bond angles (°)                                     | 0.91                                                                       | 0.94                                                                  | 1.53                                                                  | 0.55                                                          |
| <b>Ramachandran Plot</b>                            |                                                                            |                                                                       |                                                                       |                                                               |
| Favoured (%)                                        | 98.6                                                                       | 98.3                                                                  | 98.6                                                                  | 98.1                                                          |
| Outliers (%)                                        | 0.0                                                                        | 0.24                                                                  | 0.0                                                                   | 0.0                                                           |



**Table S1. X-ray data collection and refinement statistics (continued).**

|                                                     | OdinTubulin<br>Apo<br>100% PO <sub>4</sub> <sup>3-</sup><br>PDB code 7EVG | OdinTubulin<br>59% GDP<br>41% PO <sub>4</sub> <sup>3-</sup><br>PDB code 7EVH | GTP OdinTubulin<br>79% GTP, 21% GDP<br>1 Na <sup>+</sup> , 1 Mg <sup>2+</sup><br>PDB code 7EVI | GTP OdinTubulin<br>78% GTP, 22% GDP<br>2 Na <sup>+</sup><br>PDB code 7EVK |
|-----------------------------------------------------|---------------------------------------------------------------------------|------------------------------------------------------------------------------|------------------------------------------------------------------------------------------------|---------------------------------------------------------------------------|
| <b>Crystals</b>                                     |                                                                           |                                                                              |                                                                                                |                                                                           |
| Lattice                                             | P2 <sub>1</sub> 2 <sub>1</sub> 2 <sub>1</sub>                             | P2 <sub>1</sub> 2 <sub>1</sub> 2 <sub>1</sub>                                | P2 <sub>1</sub> 2 <sub>1</sub> 2 <sub>1</sub>                                                  | P2 <sub>1</sub> 2 <sub>1</sub> 2 <sub>1</sub>                             |
| <i>a</i> , <i>b</i> , <i>c</i> (Å)                  | 40.1, 94.2, 100.8                                                         | 40.3, 93.3, 100.1                                                            | 40.3, 92.2, 103.0                                                                              | 40.4 92.7 103.1                                                           |
| <i>α</i> , <i>β</i> , <i>γ</i> (°)                  | 90.0, 90.0, 90.0                                                          | 90.0, 90.0, 90.0                                                             | 90.0, 90.0, 90.0                                                                               | 90.0, 90.0, 90.0                                                          |
|                                                     | Large cell                                                                | Large cell                                                                   | Large cell                                                                                     | Large cell                                                                |
| Crystallization conditions <sup>a</sup>             | 25% PEG 1500<br>0.1 M SPG<br>pH 7.0                                       | 25% PEG 1500<br>0.1 M SPG<br>pH 9.0                                          | 20% PEG 3350<br>0.2 M sodium acetate<br>0.1 M Bis-Tris propane<br>pH 8.5                       | 20% PEG 3350<br>0.2 M sodium acetate<br>0.1 M Bis-Tris propane<br>pH 8.5  |
| Soak                                                | 100 mM Phosphate<br>(2h)                                                  | No soak                                                                      | 5 mM GTP<br>2 mM MgCl <sub>2</sub> (1 h)                                                       | 10 mM GTP<br>2 mM EGTA<br>100 mM KCl (1 h)                                |
| <b>Data collection</b>                              |                                                                           |                                                                              |                                                                                                |                                                                           |
| Beamline                                            | BL41XU, SPring-8                                                          | TPS 05A, NSRRC                                                               | TPS 05A, NSRRC                                                                                 | TPS 05A, NSRRC                                                            |
| Wavelength (Å)                                      | 1.0                                                                       | 1.0                                                                          | 1.0                                                                                            | 1.0                                                                       |
| Resolution (Å)                                      | 47.1-2.48 (2.58-2.48)                                                     | 20.0-2.50 (2.54-2.50)                                                        | 27.0-1.55 (1.58-1.55)                                                                          | 27.0-1.74 (1.78-1.75)                                                     |
| <i>R</i> <sub>merge</sub>                           | 18.5 (123.4)                                                              | 11.4 (54.4)                                                                  | 5.8 (24.5)                                                                                     | 6.5 (43.3)                                                                |
| <i>R</i> <sub>meas</sub>                            | 20.1 (134.0)                                                              | 12.4 (66.0)                                                                  | 6.4 (28.9)                                                                                     | 7.0 (50.6)                                                                |
| <i>R</i> <sub>pim</sub>                             | 7.8 (51.6)                                                                | 4.7 (36.4)                                                                   | 2.6 (14.9)                                                                                     | 2.7 (54.7)                                                                |
| <i>I</i> / <i>σ</i> ( <i>I</i> )                    | 8.6 (1.7)                                                                 | 14.7 (1.5)                                                                   | 28.4 (2.2)                                                                                     | 25.1 (1.30)                                                               |
| <i>CC</i> <sub>1/2</sub>                            | (0.576)                                                                   | (0.699)                                                                      | (0.936)                                                                                        | (0.829)                                                                   |
| Completeness (%)                                    | 99.7 (97.4)                                                               | 98.0 (79.2)                                                                  | 98.2 (77.0)                                                                                    | 98.3 (76.5)                                                               |
| Redundancy                                          | 6.6 (6.5)                                                                 | 6.4 (2.5)                                                                    | 5.6 (2.7)                                                                                      | 6.3 (2.9)                                                                 |
| <b>Refinement</b>                                   |                                                                           |                                                                              |                                                                                                |                                                                           |
| Resolution (Å)                                      | 44.4-2.48 (2.57-2.48)                                                     | 19.8-2.50 (2.75-2.50)                                                        | 26.1-1.55 (1.61-1.55)                                                                          | 26.2-1.75 (1.81-1.75)                                                     |
| No. reflections                                     | 14106 (1363)                                                              | 12598 (2169)                                                                 | 55616 (4693)                                                                                   | 39270 (3348)                                                              |
| <i>R</i> <sub>work</sub> / <i>R</i> <sub>free</sub> | 21.1/25.7 (28.1/30.0)                                                     | 19.9/24.5 (25.0/32.4)                                                        | 14.9/17.0 (19.9/25.2)                                                                          | 15.4/18.3 (24.5/29.3)                                                     |
| No. atoms                                           |                                                                           |                                                                              |                                                                                                |                                                                           |
| Protein                                             | 3371                                                                      | 3329                                                                         | 3523                                                                                           | 3523                                                                      |
| Nucleotide/Phos                                     | 5                                                                         | 33                                                                           | 60                                                                                             | 60                                                                        |
| Nucleotide site                                     | 100% PO <sub>4</sub> <sup>3-</sup>                                        | 59% GDP, 41% PO <sub>4</sub> <sup>3-</sup>                                   | 79% GTP, 21% GDP                                                                               | 78% GTP, 22% GDP                                                          |
| Ions                                                | -                                                                         | -                                                                            | 1 Na <sup>+</sup> , 1 Mg <sup>2+</sup>                                                         | 2 Na <sup>+</sup>                                                         |
| Water                                               | 40                                                                        | 45                                                                           | 404                                                                                            | 423                                                                       |
| <i>B</i> factors                                    |                                                                           |                                                                              |                                                                                                |                                                                           |
| Protein                                             | 49.5                                                                      | 33.5                                                                         | 17.5                                                                                           | 23.7                                                                      |
| Ligands                                             | 50.1                                                                      | 25.6                                                                         | 11.0                                                                                           | 17.1                                                                      |
| Water                                               | 42.2                                                                      | 42.3                                                                         | 32.7                                                                                           | 35.7                                                                      |
| r.m.s deviations                                    |                                                                           |                                                                              |                                                                                                |                                                                           |
| Bond lengths (Å)                                    | 0.002                                                                     | 0.002                                                                        | 0.012                                                                                          | 0.009                                                                     |
| Bond angles (°)                                     | 0.53                                                                      | 0.56                                                                         | 1.29                                                                                           | 1.08                                                                      |
| Ramachandran Plot                                   |                                                                           |                                                                              |                                                                                                |                                                                           |
| Favoured (%)                                        | 98.6                                                                      | 98.6                                                                         | 97.9                                                                                           | 98.6                                                                      |
| Outliers (%)                                        | 0.0                                                                       | 0.0                                                                          | 0.0                                                                                            | 0.0                                                                       |

**Table S1. X-ray data collection and refinement statistics (continued).**

|                                                     | OdinTubulin<br>64% GTP, 36% GDP<br>2 Na <sup>+</sup><br>PDB code 7EVL | OdinTubulin<br>100% GDP<br>1 Mg <sup>2+</sup><br>PDB code 7F1B                                                  | OdinTubulin<br>78% GTP, 22% GDP<br>1 K <sup>+</sup> , 1 Mg <sup>2+</sup><br>PDB code 7F1A |
|-----------------------------------------------------|-----------------------------------------------------------------------|-----------------------------------------------------------------------------------------------------------------|-------------------------------------------------------------------------------------------|
| <b>Crystals</b>                                     |                                                                       |                                                                                                                 |                                                                                           |
| Lattice                                             | P2 <sub>1</sub> 2 <sub>1</sub> 2 <sub>1</sub>                         | P2 <sub>1</sub> 2 <sub>1</sub> 2 <sub>1</sub>                                                                   | P2 <sub>1</sub> 2 <sub>1</sub> 2 <sub>1</sub>                                             |
| <i>a</i> , <i>b</i> , <i>c</i> (Å)                  | 40.2, 79.5, 90.9                                                      | 40.9, 94.4, 100.8                                                                                               | 40.4, 92.8, 102.5                                                                         |
| <i>α</i> , <i>β</i> , <i>γ</i> (°)                  | 90.0, 90.0, 90.0                                                      | 90.0, 90.0, 90.0                                                                                                | 90.0, 90.0, 90.0                                                                          |
|                                                     | Small cell                                                            | Large cell                                                                                                      | Large cell                                                                                |
| Crystallization conditions <sup>a</sup>             | 25% PEG 1500<br>0.1 M MMT<br>pH 9.0                                   | 20% PEG 3350<br>0.2 M sodium acetate<br>0.1 M Bis-Tris propane<br>pH 8.5                                        | 25% PEG 1500<br>0.1 M MMT<br>pH 9.0                                                       |
| Soak                                                | 10 mM GTP (2 h)<br>then no GTP (22 h)                                 | 10 mM GTP (1 h)<br>then no GTP (14 days)<br>1 mM MgCl <sub>2</sub> , 0.1 M<br>KCl, and 0.2 mM<br>sodium acetate | 10 mM GTP (1 h)<br>1 mM MgCl <sub>2</sub><br>100 mM KCl                                   |
| <b>Data collection</b>                              |                                                                       |                                                                                                                 |                                                                                           |
| Beamline                                            | TPS 05A, NSRRC                                                        | BL41XU, SPring-8                                                                                                | BL41XU, SPring-8                                                                          |
| Wavelength (Å)                                      | 1.0                                                                   | 1.0                                                                                                             | 1.0                                                                                       |
| Resolution (Å)                                      | 20.0-2.15 (2.19-2.15)                                                 | 29.6-2.40 (2.49-2.40)                                                                                           | 29.6-1.90 (1.94-1.90)                                                                     |
| <i>R</i> <sub>merge</sub>                           | 7.7 (55.5)                                                            | 11.7 (60.1)                                                                                                     | 12.3 (233.7)                                                                              |
| <i>R</i> <sub>meas</sub>                            | 8.3 (62.2)                                                            | 12.3 (65.7)                                                                                                     | 12.7 (239.7)                                                                              |
| <i>R</i> <sub>pim</sub>                             | 3.1 (27.3)                                                            | 3.5 (25.2)                                                                                                      | 2.8 (52.9)                                                                                |
| <i>I</i> / <i>σ</i> ( <i>I</i> )                    | 22.3 (1.3)                                                            | 13.8 (2.5)                                                                                                      | 14.9 (1.7)                                                                                |
| <i>CC</i> <sub>1/2</sub>                            | (0.834)                                                               | (0.912)                                                                                                         | (0.750)                                                                                   |
| Completeness (%)                                    | 98.1 (83.2)                                                           | 99.9 (99.7)                                                                                                     | 100.0 (100.0)                                                                             |
| Redundancy                                          | 6.7 (4.5)                                                             | 5.8 (3.4)                                                                                                       | 19.9 (20.3)                                                                               |
| <b>Refinement</b>                                   |                                                                       |                                                                                                                 |                                                                                           |
| Resolution (Å)                                      | 20.0-2.15 (2.23-2.15)                                                 | 29.6-2.40 (2.49-2.40)                                                                                           | 29.2-1.90 (1.97-1.90)                                                                     |
| No. reflections                                     | 16120 (1388)                                                          | 15867 (1533)                                                                                                    | 31181 (3036)                                                                              |
| <i>R</i> <sub>work</sub> / <i>R</i> <sub>free</sub> | 20.3/24.4 (29.5/29.6)                                                 | 20.8/25.9 (28.1/38.3)                                                                                           | 18.0/22.0 (25.2/32.6)                                                                     |
| No. atoms                                           |                                                                       |                                                                                                                 |                                                                                           |
| Protein                                             | 3330                                                                  | 3272                                                                                                            | 3417                                                                                      |
| Nucleotide                                          | 60                                                                    | 28                                                                                                              | 60                                                                                        |
| Nucleotide site                                     | 64% GTP, 36% GDP                                                      | 100% GDP                                                                                                        | 78% GTP, 22% GDP                                                                          |
| Ions                                                | 2 Na <sup>+</sup>                                                     | 1 Mg <sup>2+</sup>                                                                                              | 1 K <sup>+</sup> , 1 Mg <sup>2+</sup>                                                     |
| Water                                               | 30                                                                    | 32                                                                                                              | 176                                                                                       |
| <i>B</i> factors                                    |                                                                       |                                                                                                                 |                                                                                           |
| Protein                                             | 55.4                                                                  | 68.2                                                                                                            | 38.9                                                                                      |
| Ligands                                             | 36.7                                                                  | 76.3                                                                                                            | 30.1                                                                                      |
| Water                                               | 48.5                                                                  | 60.6                                                                                                            | 43.3                                                                                      |
| r.m.s deviations                                    |                                                                       |                                                                                                                 |                                                                                           |
| Bond lengths (Å)                                    | 0.009                                                                 | 0.002                                                                                                           | 0.011                                                                                     |
| Bond angles (°)                                     | 0.91                                                                  | 0.50                                                                                                            | 1.14                                                                                      |
| Ramachandran Plot                                   |                                                                       |                                                                                                                 |                                                                                           |
| Favoured (%)                                        | 96.4                                                                  | 98.0                                                                                                            | 97.9                                                                                      |
| Outliers (%)                                        | 0.0                                                                   | 0.0                                                                                                             | 0.00                                                                                      |

<sup>a</sup> SPG buffer - 2 succinic acid: 7 sodium dihydrogen phosphate: 7 glycine (Molecular Dimensions). MMT buffer - 1 DL-malic acid: 2 MES: 2 Tris base (Molecular Dimensions).

**Table S2. Structural similarity of the GTP-bound OdinTubulin protomer to eukaryotic tubulins and prokaryotic FtsZs and CetZs.**

|                                    |        |          |                |              |        | GTP-bound OdinTubulin |          |         |
|------------------------------------|--------|----------|----------------|--------------|--------|-----------------------|----------|---------|
| Structure                          | PDB    | Subunit  | Nucleotide     | Resolution/Å | Method | RMSD/Å                | Residues | Z-Score |
| <i>Eukaryotic Tubulins</i>         |        |          |                |              |        |                       |          |         |
| Stu2p-bound $\alpha/\beta$ tubulin | 4u3j-A | $\alpha$ | GTP            | 2.8          | X-ray  | 2.0                   | 410      | 52.4    |
| tubulin-stathmin-TTL               | 4ijj-A | $\alpha$ | GTP            | 2.6          | X-ray  | 2.1                   | 407      | 50.0    |
| Stu2p-bound $\alpha/\beta$ tubulin | 4u3j-B | $\beta$  | GTP            | 2.8          | X-ray  | 1.8                   | 403      | 54.2    |
| tubulin-stathmin-TTL               | 4ijj-B | $\beta$  | GDP            | 2.6          | X-ray  | 1.9                   | 406      | 54.2    |
| Gamma tubulin                      | 3cb2-A | $\gamma$ | GDP            | 2.3          | X-ray  | 2.2                   | 407      | 49.8    |
| <i>Eukaryotic Microtubules</i>     |        |          |                |              |        |                       |          |         |
| Deacetylated microtubule           | 6o2r-A | $\alpha$ | GTP            | 3.3          | EM     | 1.5                   | 407      | 54.3    |
| Microtubule                        | 6dpu-A | $\alpha$ | GTP            | 3.1          | EM     | 1.5                   | 407      | 54.0    |
| Deacetylated microtubule           | 6o2r-B | $\beta$  | GDP            | 3.3          | EM     | 1.4                   | 410      | 57.0    |
| Microtubule                        | 6dpu-B | $\beta$  | GMPCPP         | 3.1          | EM     | 1.4                   | 410      | 56.5    |
| <i>Prokaryotic FtsZ/CetZ/TubZ</i>  |        |          |                |              |        |                       |          |         |
| CetZ <i>M. thermophila</i>         | 3zid-B | CetZ     | GDP            | 2.0          | X-ray  | 2.5                   | 309      | 32.1    |
| CetZ <i>H. volcanii</i>            | 4b45-A | CetZ2    | GTP $\gamma$ S | 2.1          | X-ray  | 2.4                   | 308      | 32.7    |
| CetZ <i>H. volcanii</i>            | 4b46-A | CetZ1    | GDP            | 1.9          | X-ray  | 2.6                   | 309      | 32.8    |
| FtsZ <i>M. jannaschii</i>          | 1w5a-A | FtsZ     | GTP            | 2.4          | X-ray  | 3.3                   | 298      | 26.4    |
| FtsZ <i>S. aureus</i>              | 3vo8-A | FtsZ     | GDP            | 2.25         | X-ray  | 3.2                   | 279      | 23.1    |
| FtsZ <i>M. tuberculosis</i>        | 1rlu-A | FtsZ     | GTP $\gamma$ S | 2.1          | X-ray  | 2.8                   | 288      | 26.9    |
| TubZ <i>B. thuringiensis</i>       | 2xka-A | TubZ     | GTP $\gamma$ S | 3.0          | X-ray  | 3.7                   | 315      | 24.5    |

Matching numbers of residues, RMSD and Z-Score indicate the structural similarity to OdinTubulin. The most similar structures are highlighted in blue.

**Table S3. Structural similarity of a pair of GTP-bound OdinTubulin protomer to pairs of eukaryotic tubulins.**

| Structure                          | PDB    | Subunit       | Nucleotide | Resolution/Å | Method | RMSD/Å | Residues |
|------------------------------------|--------|---------------|------------|--------------|--------|--------|----------|
| <i>Eukaryotic Tubulins</i>         |        |               |            |              |        |        |          |
| Stu2p-bound $\alpha/\beta$ tubulin | 4u3j-A | $\alpha\beta$ | GTP        | 2.8          | X-ray  | 2.3    | 749      |
| tubulin-stathmin-TTL               | 4iij-A | $\alpha\beta$ | GTP        | 2.6          | X-ray  | 2.4    | 766      |
| tubulin-stathmin-TTL               | 4iij-B | $\beta\alpha$ | GDP        | 2.6          | X-ray  | 2.6    | 752      |
| <i>Eukaryotic Microtubules</i>     |        |               |            |              |        |        |          |
| Deacetylated microtubule           | 6o2r   | $\alpha\beta$ | GTP        | 3.3          | EM     | 1.3    | 799      |
| Microtubule                        | 6dpu   | $\alpha\beta$ | GTP/GTP    | 3.1          | EM     | 1.6    | 800      |
| Deacetylated microtubule           | 6o2r   | $\beta\alpha$ | GDP/GTP    | 3.3          | EM     | 1.3    | 800      |
| Microtubule                        | 6dpu   | $\beta\alpha$ | GMPCPP     | 3.1          | EM     | 1.8    | 786      |

Matching numbers of residues and RMSD values indicate the structural similarity. The most similar structures are highlighted in blue.

**Movie S1. Comparison of the GTP-bound OdinTubulin protofilament with the GDP-bound microtubule.** Superimposition, based on the lower protomer, of the two GTP-bound OdinTubulin (7EVB) symmetry-related subunits from the crystal packing (yellow) onto two subunits of eukaryotic tubulin (cyan) from the GDP-bound microtubule (PDB 6o2r). A complimentary video to Fig. 1C and fig. S3.

**Movie S2. Comparison of the GTP-bound OdinTubulin protofilament with the GMPPCP-bound microtubule.** Superimposition, based on the lower protomer, of the two GTP-bound OdinTubulin (7EVB) symmetry-related subunits from the crystal packing (yellow) onto two subunits of eukaryotic tubulin (cyan) from the guanosine-5'-[( $\alpha$ ,  $\beta$ )-methylene]triphosphate (GMPPCP)-bound microtubule (PDB 6dpu). A complimentary video to Fig. 1C and fig. S3.

**Movie S3. Comparison of the GTP-bound OdinTubulin protofilament with the stathmin-bound curved protofilament.** Superimposition, based on the lower protomer, of the two GTP-bound OdinTubulin (7EVB) symmetry-related subunits from the crystal packing (yellow) onto two subunits of eukaryotic tubulin (cyan) from the stathmin-bound curved protofilament (PDB 4ijj). A complimentary video to Fig. 1C and fig. S3.

**Movie S4. The OdinTubulin subunit interactions in the protofilament.** A complimentary video to Fig. 2A. Two subunits of GTP-bound OdinTubulin (7EVB) are depicted. The  $\alpha$ 7 helix and preceding loop (blue) and  $\alpha$ 8 helix and preceding loop (red) comprise the nucleotide sensor motif, which connects the upper and lower GTP-binding sites (sticks). Secondary structure elements are colored by domain: N-terminal (pink), intermediate (cyan), and C-terminal (orange).

**Movie S5. The OdinTubulin interactions around GTP (7EVB) and GDP (7EVE) in the protofilament. GTP 7EVB,** A complimentary video to Fig. 2C. Green, black and cyan spheres indicate a magnesium ion, a sodium ion and water molecules, respectively. The proposed hydrolytic water is shown as a red sphere, and the potential hydrogen receiving water molecule in blue. The purple dashed line indicates the direction for nucleophilic attack on the GTP  $\gamma$ -phosphate. The OMIT map is shown contoured at  $1 \sigma$  around the structure (black), with the proposed hydrolytic water density highlighted in cyan. **GDP constrained 7F1B,** A complimentary video to Fig. 2D. In the GDP-bound structure within the protofilament packing, three water molecules (purple) replace the GTP  $\gamma$ -phosphate. The OMIT map (grey) and 2Fo-Fc map (lime green) are shown contoured at  $1 \sigma$ . The OMIT map around several of the water molecules and cations is relatively weak relative to the mainchain and GDP electron density, suggesting partial occupancy. The OMIT map shows no density for one of the water molecules (purple) and very weak density in the 2Fo-Fc map at this contour level. This water is within bonding distance of the cations and is included in the structure to highlight the partial occupancy of the cation coordination.

**Movie S6. The OdinTubulin subunit interactions in the pseudo protofilament.** A complimentary video to Fig. 2F. Two subunits of phosphate bound OdinTubulin (7EVB) are depicted. The  $\alpha$ 7 helix and preceding loop (blue) and  $\alpha$ 8 helix and preceding loop (red) comprise the nucleotide sensor motif, which connects the upper and lower GTP-binding sites (sticks). Secondary structure elements are colored by domain: N-terminal (pink), intermediate (cyan), and C-terminal (orange).

**Movie S7. The conformational changes in OdinTubulin.** A complimentary video to Fig. 2G. The video shows a morph between the GTP-bound state (7EVB) and the alternate apo state (7EVG) of OdinTubulin. The  $\alpha 7$  helix and preceding loop (blue) and  $\alpha 8$  helix and preceding loop (red) comprise the nucleotide sensor motif, which connects the upper and lower GTP-binding sites (sticks). The domain domains are coloured N-terminal (pink), intermediate (cyan), and C-terminal (orange). The GTP molecules are depicted from the GTP-bound state for reference. F222 (upper), N226 (upper), D249 (lower) and E251(lower) are shown as yellow sticks, which highlights the mechanism of nucleotide sensing between the upper and lower nucleotide-binding sites.

**Movie S8. Polymerization of OdinTubulin followed by IRM.** Wide field view of the elongation of microtubules and OdinTubulin under the conditions outlined in Fig. 5.

**Movie S9. Polymerization of OdinTubulin followed by IRM.** A zoomed view of the elongation of microtubules and OdinTubulin under the conditions outlined in Fig. 5.
